# Supplementary material for: Cortical circuit alterations precede motor impairments in Huntington’s disease mice
Source: Sci Rep. 2019 Apr 29;9:6634. doi: 10.1038/s41598-019-43024-w (PMC6488584; doi:10.1038/s41598-019-43024-w)
Supplement: Supplementary file 2 — Supplementary table S1 [file 41598_2019_43024_MOESM2_ESM.xlsx]

## Sheet: Sheet1
Protein IDs	Majority protein IDs	Protein names	Gene names	ROI	Symbol color	Annotation original	Annotation figure	GOBP name	GOMF name	GOCC name	KEGG name	Pfam	GSEA	Keywords	Corum	matrix86	Student's t-test Significant LFQ intensity 5w_tg_ce_LFQ intensity 5w_nt_ce	Student's t-test Significant LFQ intensity 5w_tg_co_LFQ intensity 5w_nt_co	Student's t-test Significant LFQ intensity 5w_tg_hc_LFQ intensity 5w_nt_hc	Student's t-test Significant LFQ intensity 5w_tg_st_LFQ intensity 5w_nt_st	Student's t-test Significant LFQ intensity 8w_tg_ce_LFQ intensity 8w_nt_ce	Student's t-test Significant LFQ intensity 8w_tg_co_LFQ intensity 8w_nt_co	Student's t-test Significant LFQ intensity 8w_tg_hc_LFQ intensity 8w_nt_hc	Student's t-test Significant LFQ intensity 8w_tg_st_LFQ intensity 8w_nt_st	Peptides	Razor + unique peptides	Unique peptides	Sequence coverage [%]	Unique + razor sequence coverage [%]	Unique sequence coverage [%]	Mol. weight [kDa]	Q-value	Intensity	MS/MS Count	iBAQ	iBAQ 5w_nt_co_1	iBAQ 5w_nt_co_2	iBAQ 5w_nt_co_3	iBAQ 5w_nt_co_4	iBAQ 5w_tg_co_1	iBAQ 5w_tg_co_2	iBAQ 5w_tg_co_3	iBAQ 5w_tg_co_4	iBAQ 8w_nt_co_1	iBAQ 8w_nt_co_2	iBAQ 8w_nt_co_3	iBAQ 8w_tg_co_1	iBAQ 8w_tg_co_2	iBAQ 8w_tg_co_3
P63044;B0QZN5	P63044;B0QZN5	Vesicle-associated membrane protein 2	Vamp2	yellow	black	synaptic	synaptic	biological regulation;calcium ion-dependent exocytosis;cell activation;cell activation involved in immune response;cellular component assembly;cellular component organization;cellular component organization at cellular level;cellular component organization or biogenesis;cellular component organization or biogenesis at cellular level;cellular membrane fusion;cellular membrane organization;cellular…	binding;calcium-dependent protein binding;calmodulin binding;lipid binding;phospholipid binding;protein binding;SNAP receptor activity;SNARE binding;syntaxin binding;syntaxin-1 binding	cell junction;cell part;cell projection part;clathrin coated vesicle membrane;clathrin-coated vesicle;coated vesicle;coated vesicle membrane;cytoplasmic membrane-bounded vesicle;cytoplasmic part;cytoplasmic vesicle;cytoplasmic vesicle membrane;cytoplasmic vesicle part;extracellular membrane-bounded organelle;extracellular organelle;extracellular region part;extracellular vesicular exosome;Golgi a…	Salivary secretion;SNARE interactions in vesicular transport;Vasopressin-regulated water reabsorption	Synaptobrevin	AAGWWRNYGGC_UNKNOWN;ACATTCC,MIR-1,MIR-206;ACTGAAA,MIR-30A-3P,MIR-30E-3P;ACTGCCT,MIR-34B;AGCTCCT,MIR-28;AGGAGTG,MIR-483;AMBROSINI_FLAVOPIRIDOL_TREATMENT_TP53;ATGCTGG,MIR-338;ATGTACA,MIR-493;BENPORATH_MYC_TARGETS_WITH_EBOX;BLALOCK_ALZHEIMERS_DISEASE_DN;BRUINS_UVC_RESPONSE_VIA_TP53_GROUP_A;CACTGCC,MIR-34A,MIR-34C,MIR-449;CAGGTG_V$E12_Q6;CHAUHAN_RESPONSE_TO_METHOXYESTRADIOL_DN;chr17p13;CTATGCA,MIR-15…	Acetylation;Celljunction;Coiledcoil;Completeproteome;Cytoplasmicvesicle;Directproteinsequencing;Membrane;Proteomicsidentification;Referenceproteome;Synapse;Synaptosome;Transmembrane;Transmembranehelix	SNARE complex (Stx4, Vamp2, Snap23);SNARE complex (Vamp2, Snap25, Stx1a, Cplx1);SNARE complex (Vamp2, Snap25, Stx1a, Cplx2)							+			11	11	5	70.7	70.7	44	1.1035	0	761000000000	2654	11.1826	1051300000	1668200000	160860000	108350000	520930000	290580000	401370000	895980000	586790000	1472700000	630540000	2596900	4690500	4033900
Q91XV3	Q91XV3	Brain acid soluble protein 1	Basp1	yellow	black	synaptic	synaptic	anatomical structure development;biological regulation;cell differentiation;cell differentiation involved in kidney development;cellular developmental process;cellular process;developmental process;epithelial cell differentiation;epithelial cell differentiation involved in kidney development;glomerular epithelial cell differentiation;glomerular visceral epithelial cell differentiation;negative re…	binding;DNA binding;nucleic acid binding;protein binding;protein binding transcription factor activity;protein domain specific binding;regulatory region DNA binding;regulatory region nucleic acid binding;transcription cofactor activity;transcription corepressor activity;transcription factor binding transcription factor activity;transcription regulatory region DNA binding	cell junction;cell part;cell projection part;cytoplasm;extracellular membrane-bounded organelle;extracellular organelle;extracellular region part;extracellular vesicular exosome;growth cone;intracellular membrane-bounded organelle;intracellular organelle;intracellular organelle part;intracellular part;macromolecular complex;membrane;membrane-bounded organelle;membrane-bounded vesicle;nuclear body…		BASP1	AACATTC,MIR-409-3P;AACTTT_UNKNOWN;ACEVEDO_FGFR1_TARGETS_IN_PROSTATE_CANCER_MODEL_UP;ATGTACA,MIR-493;BCAT_GDS748_DN;BEIER_GLIOMA_STEM_CELL_DN;BOQUEST_STEM_CELL_UP;BOYLAN_MULTIPLE_MYELOMA_C_D_DN;BOYLAN_MULTIPLE_MYELOMA_PCA1_UP;CAGTATT,MIR-200B,MIR-200C,MIR-429;CAIRO_LIVER_DEVELOPMENT_UP;CATTGTYY_V$SOX9_B1;CHANDRAN_METASTASIS_TOP50_UP;CHANDRAN_METASTASIS_UP;CHARAFE_BREAST_CANCER_LUMINAL_VS_MESENCHYM…	Cellmembrane;Cellprojection;Completeproteome;Directproteinsequencing;Lipoprotein;Membrane;Myristate;Phosphoprotein;Referenceproteome								+			36	36	36	95.6	95.6	95.6	1.34412	0	1950000000000	5219	11.2892	4812600000	4767600000	229430000	162160000	919100000	580610000	374630000	790160000	277750000	3953500000	1571700000	986190	1716100	1499600
E9PUL5	E9PUL5	Proline-rich transmembrane protein 2	Prrt2	yellow	black	synaptic	synaptic	multicellular organismal process;neurological system process;neuromuscular process;neuromuscular process controlling posture;response to biotic stimulus;response to stimulus;system process		cell junction;cell part;integral to membrane;intrinsic to membrane;membrane;membrane part;plasma membrane;synapse		Dispanin	AACTTT_UNKNOWN;ACCAAAG,MIR-9;BAKKER_FOXO3_TARGETS_DN;CHARAFE_BREAST_CANCER_LUMINAL_VS_BASAL_UP;CHICAS_RB1_TARGETS_SENESCENT;chr16p11;CORRE_MULTIPLE_MYELOMA_DN;CREIGHTON_ENDOCRINE_THERAPY_RESISTANCE_4;CSR_EARLY_UP.V1_DN;CSR_LATE_UP.V1_DN;GACTGTT,MIR-212,MIR-132;GAGCCTG,MIR-484;GGGACCA,MIR-133A,MIR-133B;GGGAGGRR_V$MAZ_Q6;GRADE_COLON_AND_RECTAL_CANCER_DN;GTTNYYNNGGTNA_UNKNOWN;GTTTGTT,MIR-495;KTGGYRS…	Celljunction;Cellmembrane;Completeproteome;Membrane;Referenceproteome;Synapse;Transmembrane;Transmembranehelix							+	+		+	12	12	12	57.8	57.8	57.8	1.55537	0	157000000000	878	10.116	304730000	288360000	26943000	31200000	54019000	26116000	35755000	20075000	61095000	238840000	160280000	326810	236640	0
O35526;D6RFB9	O35526;D6RFB9	Syntaxin-1A	Stx1a	yellow	black	synaptic	synaptic	biological regulation;calcium ion-dependent exocytosis;cellular chemical homeostasis;cellular component organization;cellular component organization at cellular level;cellular component organization or biogenesis;cellular component organization or biogenesis at cellular level;cellular homeostasis;cellular ion homeostasis;cellular membrane fusion;cellular membrane organization;cellular process;che…	binding;calcium channel inhibitor activity;calcium channel regulator activity;channel inhibitor activity;channel regulator activity;chloride channel inhibitor activity;chloride channel regulator activity;cytoskeletal protein binding;enzyme binding;glycoprotein binding;ion channel inhibitor activity;kinase binding;myosin binding;protein binding;SNAP receptor activity;SNARE binding	actomyosin;cell junction;cell part;cell projection;clathrin coated vesicle membrane;clathrin-coated vesicle;coated vesicle;coated vesicle membrane;cytoplasmic membrane-bounded vesicle;cytoplasmic part;cytoplasmic vesicle;cytoplasmic vesicle membrane;cytoplasmic vesicle part;cytoskeletal part;endomembrane system;integral to membrane;intracellular membrane-bounded organelle;intracellular organelle;…	SNARE interactions in vesicular transport	SNARE;Syntaxin	AACTTT_UNKNOWN;ACCAAAG,MIR-9;ATGCAGT,MIR-217;BENPORATH_ES_WITH_H3K27ME3;BHAT_ESR1_TARGETS_VIA_AKT1_UP;BILD_HRAS_ONCOGENIC_SIGNATURE;BLALOCK_ALZHEIMERS_DISEASE_DN;BMI1_DN.V1_UP;BMI1_DN_MEL18_DN.V1_UP;BUYTAERT_PHOTODYNAMIC_THERAPY_STRESS_UP;CAGGTG_V$E12_Q6;CAGTATT,MIR-200B,MIR-200C,MIR-429;CAHOY_NEURONAL;CELL_CELL_SIGNALING;chr7q11;CTTTGA_V$LEF1_Q2;E2F3_UP.V1_DN;ESTABLISHMENT_OF_LOCALIZATION;FERREI…	Celljunction;Coiledcoil;Completeproteome;Cytoplasmicvesicle;Directproteinsequencing;Exocytosis;Membrane;Neurotransmittertransport;Phosphoprotein;Proteomicsidentification;Referenceproteome;Synapse;Synaptosome;Transmembrane;Transmembranehelix;Transport	SNARE complex (Vamp2, Snap25, Stx1a, Cplx1);SNARE complex (Vamp2, Snap25, Stx1a, Cplx2)							+		+	30	25	25	76	68.1	68.1	1.51922	0	490000000000	2343	10.5761	684680000	963790000	221060000	257010000	334210000	187310000	346170000	212300000	470630000	710530000	480600000	644680	1259000	1573500
O55100;O55100-2	O55100;O55100-2	Synaptogyrin-1	Syngr1	yellow	black	synaptic	synaptic	biological regulation;establishment of localization;establishment of localization in cell;establishment of protein localization;intracellular protein transport;intracellular transport;protein targeting;protein transport;regulation of biological process;regulation of biological quality;regulation of cell communication;regulation of cellular process;regulation of long-term neuronal synaptic plastic…		cell junction;cell part;clathrin coated vesicle membrane;clathrin-coated vesicle;coated vesicle;coated vesicle membrane;cytoplasmic membrane-bounded vesicle;cytoplasmic part;cytoplasmic vesicle;cytoplasmic vesicle membrane;cytoplasmic vesicle part;integral to membrane;intracellular membrane-bounded organelle;intracellular organelle;intracellular organelle part;intracellular part;intrinsic to memb…		MARVEL	AAGCACA,MIR-218;ACTGCCT,MIR-34B;ALCALAY_AML_BY_NPM1_LOCALIZATION_DN;BLALOCK_ALZHEIMERS_DISEASE_DN;BYSTRYKH_HEMATOPOIESIS_STEM_CELL_QTL_TRANS;CAGCCTC,MIR-485-5P;CAGGTG_V$E12_Q6;CHARAFE_BREAST_CANCER_LUMINAL_VS_MESENCHYMAL_UP;CHEN_METABOLIC_SYNDROM_NETWORK;chr22q13;CTTTGT_V$LEF1_Q2;DANG_REGULATED_BY_MYC_UP;DOANE_RESPONSE_TO_ANDROGEN_UP;DODD_NASOPHARYNGEAL_CARCINOMA_UP;GARCIA_TARGETS_OF_FLI1_AND_DAX…	Acetylation;Alternativesplicing;Celljunction;Completeproteome;Directproteinsequencing;Membrane;Referenceproteome;Synapse;Transmembrane;Transmembranehelix								+			5	5	5	30.8	30.8	30.8	1.40912	0	139000000000	423	10.4454	242240000	281080000	180130000	110380000	274340000	79888000	188780000	95630000	139000000	221800000	74902000	126500000	102180000	63330000
P06837	P06837	Neuromodulin	Gap43	yellow	black	synaptic	synaptic	anatomical structure development;anatomical structure morphogenesis;axon choice point recognition;axon guidance;biological regulation;cell differentiation;cell fate commitment;cell recognition;cellular developmental process;cellular process;chemotaxis;developmental growth;developmental process;glial cell differentiation;growth;locomotion;neuron recognition;regeneration;regulation of biological pr…	binding;calmodulin binding;protein binding	axon;cell junction;cell part;cell periphery;cell projection;cell projection membrane;cell projection part;cytoplasm;cytoskeletal part;filopodium membrane;growth cone membrane;intracellular organelle part;intracellular part;membrane;membrane part;neuron projection;organelle part;plasma membrane;plasma membrane part;postsynaptic density;synapse part		IQ;Neuromodulin;Neuromodulin_N	ACCTGTTG_UNKNOWN;ACTIVATION_OF_PROTEIN_KINASE_ACTIVITY;BENPORATH_OCT4_TARGETS;BLALOCK_ALZHEIMERS_DISEASE_DN;BROWNE_HCMV_INFECTION_18HR_UP;BRUINS_UVC_RESPONSE_LATE;CAGCTG_V$AP4_Q5;CAGGTA_V$AREB6_01;CAGGTG_V$E12_Q6;CELL_SURFACE_RECEPTOR_LINKED_SIGNAL_TRANSDUCTION_GO_0007166;chr3q13;ESC_J1_UP_EARLY.V1_DN;ESC_J1_UP_LATE.V1_DN;ESC_V6.5_UP_EARLY.V1_DN;G_PROTEIN_COUPLED_RECEPTOR_PROTEIN_SIGNALING_PATHWA…	3D-structure;Calmodulin-binding;Celljunction;Cellmembrane;Cellprojection;Completeproteome;Developmentalprotein;Differentiation;Directproteinsequencing;Growthregulation;Lipoprotein;Membrane;Neurogenesis;Palmitate;Phosphoprotein;Referenceproteome;Synapse								+		+	29	29	29	83.3	83.3	83.3	1.3735	0	1030000000000	2801	10.8976	1244600000	1675400000	17480000	9273200	111150000	58193000	5389500	110150000	14115000	1191100000	392600000	166390	264410	389400
P63040;D3YZ72	P63040	Complexin-1	Cplx1	yellow	black	synaptic	synaptic	biological regulation;cellular process;establishment of localization;establishment of localization in cell;exocytosis;hormone secretion;hormone transport;insulin secretion;peptide hormone secretion;peptide secretion;peptide transport;regulation of biological quality;regulation of hormone levels;secretion;secretion by cell;signal release;synaptic vesicle exocytosis;synaptic vesicle transport;trans…	binding;neurotransmitter transporter activity;protein binding;SNARE binding;syntaxin binding;syntaxin-1 binding;transmembrane transporter activity;transporter activity	cell body;cell part;cell projection;cytoplasmic part;cytosol;dendrite;intracellular part;macromolecular complex;membrane part;neuron projection;neuronal cell body;protein complex;SNARE complex;synapse;synaptobrevin 2-SNAP-25-syntaxin-1a-complexin I complex		Synaphin	AAGCCAT,MIR-135A,MIR-135B;CELL_CELL_SIGNALING;CELLULAR_LOCALIZATION;chr4p16;ESTABLISHMENT_OF_CELLULAR_LOCALIZATION;ESTABLISHMENT_OF_LOCALIZATION;EXOCYTOSIS;FOSTER_KDM1A_TARGETS_DN;GSE13306_TREG_RA_VS_TCONV_RA_DN;GSE17721_PAM3CSK4_VS_CPG_16H_BMDM_DN;HOOI_ST7_TARGETS_UP;JIANG_AGING_CEREBRAL_CORTEX_DN;LASTOWSKA_NEUROBLASTOMA_COPY_NUMBER_DN;LEE_DOUBLE_POLAR_THYMOCYTE;LEIN_NEURON_MARKERS;MATZUK_SPERMA…	Coiledcoil;Completeproteome;Cytoplasm;Exocytosis;Neurotransmittertransport;Proteomicsidentification;Referenceproteome;Transport	SNARE complex (Vamp2, Snap25, Stx1a, Cplx1)							+			15	9	9	82.1	63.4	63.4	1.17961	0	143000000000	694	10.4568	1019000000	1315700000	29964000	24461000	142560000	37019000	45162000	69127000	96537000	291190000	371800000	7933600	0	0
P20065-2;P20065;Q9D2R9;A2AEH9	P20065-2;P20065	Thymosin beta-4;Hematopoietic system regulatory peptide	Tmsb4x	yellow	grey	cytoskeleton	cytoskeleton	actin cytoskeleton organization;actin filament organization;actin filament-based process;biological regulation;cellular component organization;cellular component organization at cellular level;cellular component organization or biogenesis;cellular component organization or biogenesis at cellular level;cellular process;cytoskeleton organization;maintenance of location;maintenance of protein locati…		cell part;cytoplasm;cytoplasmic part;cytoskeleton;cytosol;intracellular membrane-bounded organelle;intracellular non-membrane-bounded organelle;intracellular organelle;intracellular part;membrane-bounded organelle;non-membrane-bounded organelle;nucleus;organelle	Regulation of actin cytoskeleton	Thymosin	AAAYRNCTG_UNKNOWN;AACTTT_UNKNOWN;ABDULRAHMAN_KIDNEY_CANCER_VHL_UP;ACAWYAAAG_UNKNOWN;ACEVEDO_LIVER_CANCER_WITH_H3K27ME3_UP;APPIERTO_RESPONSE_TO_FENRETINIDE_DN;ATATGCA,MIR-448;ATGCAGT,MIR-217;BAE_BRCA1_TARGETS_UP;BASSO_CD40_SIGNALING_UP;BENPORATH_MYC_MAX_TARGETS;BERENJENO_TRANSFORMED_BY_RHOA_REVERSIBLY_DN;BERENJENO_TRANSFORMED_BY_RHOA_UP;BROWNE_HCMV_INFECTION_20HR_UP;BRUINS_UVC_RESPONSE_VIA_TP53_GR…	3D-structure;Acetylation;Actin-binding;Alternativesplicing;Completeproteome;Cytoplasm;Cytoskeleton;Referenceproteome	Tmsb4x-Lims1-Ilk complex							+			12	12	11	90.9	90.9	90.9	0.703515	0	2000000000000	1605	12.001	4226600000	4761200000	182920000	106760000	1038100000	992330000	198360000	1736200000	190360000	3070200000	1431200000	3299100	6490800	4428100
P55821	P55821	Stathmin-2	Stmn2	yellow	grey	cytoskeleton	cytoskeleton	biological regulation;cell projection organization;cellular component disassembly;cellular component disassembly at cellular level;cellular component organization;cellular component organization at cellular level;cellular component organization or biogenesis;cellular component organization or biogenesis at cellular level;cellular macromolecular complex disassembly;cellular macromolecular complex …	binding;calcium-dependent protein binding;cytoskeletal protein binding;protein binding;tubulin binding	axon;cell body;cell part;cell projection;cell projection part;cytoplasm;cytoplasmic part;endosome;Golgi apparatus;growth cone;intracellular membrane-bounded organelle;intracellular organelle;intracellular part;lamellipodium;membrane;membrane-bounded organelle;neuron projection;neuronal cell body;organelle;perinuclear region of cytoplasm;site of polarized growth;vesicle		Stathmin	ACTWSNACTNY_UNKNOWN;ALK_DN.V1_UP;ATF2_S_UP.V1_DN;BENPORATH_EED_TARGETS;BENPORATH_ES_WITH_H3K27ME3;BENPORATH_OCT4_TARGETS;BENPORATH_PRC2_TARGETS;BENPORATH_SUZ12_TARGETS;BLALOCK_ALZHEIMERS_DISEASE_DN;BROWNE_HCMV_INFECTION_16HR_DN;BYSTRYKH_HEMATOPOIESIS_STEM_CELL_AND_BRAIN_QTL_TRANS;CAGCTG_V$AP4_Q5;CAGGTG_V$E12_Q6;chr8q21;COWLING_MYCN_TARGETS;CTGCAGY_UNKNOWN;CTTTGT_V$LEF1_Q2;DASU_IL6_SIGNALING_UP;DE…	Cellprojection;Coiledcoil;Completeproteome;Cytoplasm;Endosome;Golgiapparatus;Lipoprotein;Membrane;Palmitate;Phosphoprotein;Referenceproteome;Ublconjugation											16	12	12	65.4	55.9	55.9	1.31865	0	181000000000	354	10.2577	272590000	394030000	6454100	10029000	105180000	57706000	22558000	11348000	16369000	46147000	79165000	0	777470	0
P84244;P02301;F8WI35;E0CZ27;E0CYR7;E0CYN1	P84244;P02301;F8WI35;E0CZ27	Histone H3.3;Histone H3.3C;Histone H3	H3f3a;H3f3c	yellow	grey	histone	histone	biological regulation;cellular process;chromatin silencing;chromatin silencing at rDNA;gene silencing;negative regulation of biological process;negative regulation of biosynthetic process;negative regulation of cellular biosynthetic process;negative regulation of cellular macromolecule biosynthetic process;negative regulation of cellular metabolic process;negative regulation of cellular process;n…	binding;DNA binding;nucleic acid binding	cell part;chromosomal part;intracellular membrane-bounded organelle;intracellular organelle;intracellular organelle part;intracellular part;macromolecular complex;membrane-bounded organelle;nuclear part;nucleoplasm;nucleosome;nucleus;organelle;organelle part;protein-DNA complex	Systemic lupus erythematosus	Histone	AAAYRNCTG_UNKNOWN;AACTTT_UNKNOWN;ACAGGGT,MIR-10A,MIR-10B;ACEVEDO_LIVER_CANCER_UP;ACEVEDO_LIVER_TUMOR_VS_NORMAL_ADJACENT_TISSUE_UP;ACEVEDO_METHYLATED_IN_LIVER_CANCER_DN;ACTGTGA,MIR-27A,MIR-27B;ACTTTAT,MIR-142-5P;AGCATTA,MIR-155;AGGAGTG,MIR-483;AMIT_EGF_RESPONSE_60_HELA;ATGTTAA,MIR-302C;ATGTTTC,MIR-494;BERENJENO_TRANSFORMED_BY_RHOA_DN;CACGTG_V$MYC_Q2;CACTGTG,MIR-128A,MIR-128B;CAGGGTC,MIR-504;CATTTC…	Acetylation;Chromosome;Citrullination;Completeproteome;DNA-binding;Methylation;Nucleosomecore;Nucleus;Phosphoprotein;Referenceproteome;Ublconjugation							+	+		+	23	4	4	84.6	31.6	31.6	1.18549	0	266000000000	360	10.8228	709360000	756410000	927110000	751560000	110620000	78879000	223070000	426730000	666190000	171450000	662860000	1586400	273640	159960
Q9WUC3;Q8K356	Q9WUC3;Q8K356	Lymphocyte antigen 6H	Ly6h	yellow	grey	immune function	immune function			anchored to membrane;cell part;intrinsic to membrane;membrane;membrane part;plasma membrane		UPAR_LY6	ANATOMICAL_STRUCTURE_DEVELOPMENT;ANATOMICAL_STRUCTURE_MORPHOGENESIS;BENPORATH_ES_WITH_H3K27ME3;BYSTRYKH_HEMATOPOIESIS_STEM_CELL_QTL_TRANS;CAGGTG_V$E12_Q6;chr8q24;CREIGHTON_ENDOCRINE_THERAPY_RESISTANCE_2;CTGCAGY_UNKNOWN;ENK_UV_RESPONSE_KERATINOCYTE_UP;GSE17721_CTRL_VS_CPG_24H_BMDM_UP;GSE17721_CTRL_VS_LPS_0.5H_BMDM_DN;GSE17721_LPS_VS_CPG_2H_BMDM_UP;GSE26495_PD1HIGH_VS_PD1LOW_CD8_TCELL_DN;GSE9006_HE…	Cellmembrane;Completeproteome;Disulfidebond;Glycoprotein;GPI-anchor;Lipoprotein;Membrane;Proteomicsidentification;Referenceproteome;Signal								+			8	8	8	41.7	41.7	41.7	1.1664	0	76631000000	377	9.98131	125920000	190840000	11484000	12838000	40915000	34671000	44463000	39464000	44292000	88728000	62556000	458820	1367400	2483000
Q9D0J8	Q9D0J8	Parathymosin	Ptms	yellow	grey	immune function	immune function	immune system process				Prothymosin	ACEVEDO_LIVER_CANCER_DN;ACEVEDO_NORMAL_TISSUE_ADJACENT_TO_LIVER_TUMOR_DN;AMUNDSON_POOR_SURVIVAL_AFTER_GAMMA_RADIATION_2G;BENPORATH_CYCLING_GENES;BILANGES_SERUM_AND_RAPAMYCIN_SENSITIVE_GENES;BILANGES_SERUM_RESPONSE_TRANSLATION;BIOPOLYMER_METABOLIC_PROCESS;CAGGTA_V$AREB6_01;CAGGTG_V$E12_Q6;CCCNNGGGAR_V$OLF1_01;chr17q12;CTTTGT_V$LEF1_Q2;CYCLIN_D1_UP.V1_UP;DNA_METABOLIC_PROCESS;DNA_REPLICATION;ERB2_U…	Acetylation;Completeproteome;Immunity;Phosphoprotein;Referenceproteome								+			7	7	7	27.7	27.7	27.7	1.05805	0	446000000000	816	11.1724	808010000	608310000	31546000	8216100	472110000	376010000	78828000	150530000	81048000	408040000	350580000	4642300	24538000	14176000
P17665;J3QNB4;B8JJA9	P17665	Cytochrome c oxidase subunit 7C, mitochondrial	Cox7c	yellow	grey	mitochondria	mitochondria		catalytic activity;cation transmembrane transporter activity;cytochrome-c oxidase activity;heme-copper terminal oxidase activity;hydrogen ion transmembrane transporter activity;inorganic cation transmembrane transporter activity;ion transmembrane transporter activity;monovalent inorganic cation transmembrane transporter activity;oxidoreductase activity;oxidoreductase activity, acting on a heme gr…	cell part;cytoplasmic part;integral to membrane;intracellular membrane-bounded organelle;intracellular organelle;intracellular organelle part;intracellular part;intrinsic to membrane;membrane;membrane part;membrane-bounded organelle;mitochondrial inner membrane;mitochondrial membrane;mitochondrial part;mitochondrion;organelle;organelle inner membrane;organelle membrane;organelle part	Alzheimer's disease;Cardiac muscle contraction;Huntington's disease;Oxidative phosphorylation;Parkinson's disease	COX7C	ACTAYRNNNCCCR_UNKNOWN;BAE_BRCA1_TARGETS_UP;BENPORATH_MYC_MAX_TARGETS;BERNARD_PPAPDC1B_TARGETS_UP;BLALOCK_ALZHEIMERS_DISEASE_DN;BLALOCK_ALZHEIMERS_DISEASE_INCIPIENT_DN;BOUDOUKHA_BOUND_BY_IGF2BP2;BRUECKNER_TARGETS_OF_MIRLET7A3_UP;CHICAS_RB1_TARGETS_LOW_SERUM;chr5q14;DANG_BOUND_BY_MYC;DAZARD_RESPONSE_TO_UV_NHEK_UP;DAZARD_UV_RESPONSE_CLUSTER_G1;FLECHNER_PBL_KIDNEY_TRANSPLANT_REJECTED_VS_OK_DN;GNF2_DA…	Acetylation;Completeproteome;Directproteinsequencing;Membrane;Mitochondrion;Mitochondrioninnermembrane;Proteomicsidentification;Referenceproteome;Transitpeptide;Transmembrane;Transmembranehelix	Cytochrome c oxidase (EC 1.9.3.1), mitochondrial							+		+	6	6	6	65.1	65.1	65.1	0.865252	0	144000000000	287	10.4606	845060000	234380000	180110000	238290000	636220000	128360000	324060000	607530000	451560000	632990000	322540000	15720000	47891000	28179000
Q6PCP5;E0CYB9;Q6PCP5-3;Q6PCP5-4;E0CYI3;F7BC60	Q6PCP5;E0CYB9;Q6PCP5-3;Q6PCP5-4;E0CYI3;F7BC60	Mitochondrial fission factor	Mff	yellow	grey	mitochondria	mitochondria	anatomical structure morphogenesis;apoptotic mitochondrial changes;biological regulation;cell part morphogenesis;cellular component assembly;cellular component morphogenesis;cellular component organization;cellular component organization at cellular level;cellular component organization or biogenesis;cellular component organization or biogenesis at cellular level;cellular developmental process;ce…	binding;identical protein binding;protein binding;protein dimerization activity;protein homodimerization activity	cell junction;cell part;clathrin-coated vesicle;coated vesicle;cytoplasmic membrane-bounded vesicle;cytoplasmic part;cytoplasmic vesicle;integral to membrane;integral to mitochondrial membrane;integral to organelle membrane;intracellular membrane-bounded organelle;intracellular organelle;intracellular organelle part;intracellular part;intrinsic to membrane;intrinsic to organelle membrane;membrane…		Miff	ALCALA_APOPTOSIS;BLALOCK_ALZHEIMERS_DISEASE_DN;BOYAULT_LIVER_CANCER_SUBCLASS_G12_UP;CAIRO_HEPATOBLASTOMA_UP;chr2q36;DODD_NASOPHARYNGEAL_CARCINOMA_DN;EGFR_UP.V1_DN;GSE10239_MEMORY_VS_DAY4.5_EFF_CD8_TCELL_DN;GSE10239_NAIVE_VS_MEMORY_CD8_TCELL_UP;GSE14000_UNSTIM_VS_16H_LPS_DC_TRANSLATED_RNA_UP;GSE14026_TH1_VS_TH17_DN;GSE1448_CTRL_VS_ANTI_VALPHA2_DP_THYMOCYTE_DN;GSE15215_CD2_POS_VS_NEG_PDC_DN;GSE1772…	Alternativesplicing;Celljunction;Coiledcoil;Completeproteome;Cytoplasmicvesicle;Membrane;Mitochondrion;Mitochondrionoutermembrane;Peroxisome;Phosphoprotein;Proteomicsidentification;Referenceproteome;Synapse;Transmembrane;Transmembranehelix							+	+		+	24	24	6	87.3	87.3	16.5	1.5176	0	168000000000	1238	9.99425	57865000	88570000	63264000	45460000	15102000	1800700	21184000	22492000	76373000	67659000	30268000	135910	173690	69425
Q9CRB9;Q9D9P1;S4R238;F6QFL0	Q9CRB9;Q9D9P1	Coiled-coil-helix-coiled-coil-helix domain-containing protein 3, mitochondrial	Chchd3	yellow	grey	mitochondria	mitochondria	biological regulation;cellular component organization;cellular component organization at cellular level;cellular component organization or biogenesis;cellular component organization or biogenesis at cellular level;cellular membrane fusion;cellular membrane organization;cellular process;inner mitochondrial membrane organization;membrane fusion;membrane organization;mitochondrial fusion;mitochondri…	binding;enzyme binding;phosphatase binding;protein binding;protein complex scaffold;structural molecule activity	cell part;cytoplasm;cytoplasmic part;extracellular membrane-bounded organelle;extracellular organelle;extracellular region part;extracellular vesicular exosome;intracellular membrane-bounded organelle;intracellular organelle;intracellular organelle part;intracellular part;membrane;membrane-bounded organelle;membrane-bounded vesicle;mitochondrial inner membrane;mitochondrial membrane;mitochondrial…		DUF737	ACCTGTTG_UNKNOWN;ACEVEDO_LIVER_CANCER_UP;BRUINS_UVC_RESPONSE_LATE;BURTON_ADIPOGENESIS_6;CAGGTG_V$E12_Q6;CASORELLI_ACUTE_PROMYELOCYTIC_LEUKEMIA_DN;chr7q33;CHUNG_BLISTER_CYTOTOXICITY_UP;CYTOPLASM;CYTOPLASMIC_PART;DODD_NASOPHARYNGEAL_CARCINOMA_DN;GARCIA_TARGETS_OF_FLI1_AND_DAX1_DN;GATTGGY_V$NFY_Q6_01;GGGCGGR_V$SP1_Q6;GNF2_HAT1;GNF2_PA2G4;GNF2_RRM1;GRAESSMANN_APOPTOSIS_BY_DOXORUBICIN_DN;GSE11924_TH1_…	Acetylation;Completeproteome;Cytoplasm;Directproteinsequencing;Lipoprotein;Membrane;Mitochondrion;Mitochondrioninnermembrane;Myristate;Nucleus;Phosphoprotein;Proteomicsidentification;Referenceproteome;Repressor;Transcription;Transcriptionregulation								+			17	17	3	60.4	60.4	16.7	1.42052	0	348000000000	1435	10.4625	237130000	272210000	25657000	37754000	105660000	46960000	46027000	75020000	87912000	108270000	115930000	395200	0	1667000
Q9D3D9;D3Z7S4	Q9D3D9	ATP synthase subunit delta, mitochondrial	Atp5d	yellow	grey	mitochondria	mitochondria	ATP biosynthetic process;ATP metabolic process;ATP synthesis coupled proton transport;biosynthetic process;cation transport;cellular biosynthetic process;cellular metabolic process;cellular nitrogen compound biosynthetic process;cellular nitrogen compound metabolic process;cellular process;energy coupled proton transport, down electrochemical gradient;establishment of localization;heterocycle bio…	active transmembrane transporter activity;ATPase activity;ATPase activity, coupled;ATPase activity, coupled to movement of substances;ATPase activity, coupled to transmembrane movement of ions;ATPase activity, coupled to transmembrane movement of substances;catalytic activity;cation transmembrane transporter activity;cation-transporting ATPase activity;hydrogen ion transmembrane transporter activ…	cell part;cytoplasmic part;envelope;intracellular membrane-bounded organelle;intracellular organelle;intracellular organelle part;intracellular part;macromolecular complex;membrane;membrane part;membrane-bounded organelle;mitochondrial envelope;mitochondrial inner membrane;mitochondrial membrane;mitochondrial membrane part;mitochondrial part;mitochondrial proton-transporting ATP synthase complex;…	Alzheimer's disease;Huntington's disease;Oxidative phosphorylation;Parkinson's disease	ATP-synt_DE_N	BANDRES_RESPONSE_TO_CARMUSTIN_WITHOUT_MGMT_48HR_DN;BURTON_ADIPOGENESIS_6;BYSTRYKH_HEMATOPOIESIS_STEM_CELL_QTL_TRANS;CHEN_LUNG_CANCER_SURVIVAL;chr19p13;CROMER_METASTASIS_DN;CYTOPLASM;CYTOPLASMIC_PART;DAIRKEE_TERT_TARGETS_UP;DOANE_RESPONSE_TO_ANDROGEN_DN;E2F1_UP.V1_UP;ENK_UV_RESPONSE_KERATINOCYTE_UP;ENVELOPE;GARY_CD5_TARGETS_UP;GOLDRATH_HOMEOSTATIC_PROLIFERATION;GSE14308_TH17_VS_INDUCED_TREG_DN;GSE…	Acetylation;ATPsynthesis;CF(1);Completeproteome;Directproteinsequencing;Hydrogeniontransport;Iontransport;Isopeptidebond;Membrane;Mitochondrion;Mitochondrioninnermembrane;Proteomicsidentification;Referenceproteome;Transitpeptide;Transport;Ublconjugation								+			9	9	9	70.8	70.8	70.8	1.24551	0	397000000000	598	10.9002	817100000	934080000	38420000	19013000	545000000	466400000	43427000	175930000	32421000	700450000	534890000	315510	0	0
P01942	P01942	Hemoglobin subunit alpha	Hba	yellow	grey	oxygen transport	oxygen transport	response to chemical stimulus;response to organic substance;response to stilbenoid;response to stimulus	binding;cation binding;heme binding;ion binding;iron ion binding;metal ion binding;oxygen binding;oxygen transporter activity;substrate-specific transporter activity;tetrapyrrole binding;transition metal ion binding;transporter activity	cell part;cytoplasmic part;cytosolic part;hemoglobin complex;intracellular part;macromolecular complex;myelin sheath;protein complex		Globin		3D-structure;Acetylation;Completeproteome;Directproteinsequencing;Heme;Iron;Metal-binding;Oxygentransport;Phosphoprotein;Polymorphism;Referenceproteome;Transport											23	5	5	100	25.4	25.4	1.17855	0	913000000000	1240	11.0572	3762700000	44011000	1289000000	7894500	225980000	581810000	870830000	2060800000	5000500	0	1158700000	647440	837680	1325300
Q9CQZ1	Q9CQZ1	Heat shock factor-binding protein 1	Hsbp1	yellow	grey	chaperone	proteostasis	cell differentiation;cellular developmental process;cellular process;developmental process;endodermal cell differentiation;multicellular organismal process;muscle contraction;muscle system process;system process		cell part;cytoskeleton;intracellular membrane-bounded organelle;intracellular non-membrane-bounded organelle;intracellular organelle;intracellular part;membrane-bounded organelle;non-membrane-bounded organelle;nucleus;organelle		HSBP1	ACEVEDO_LIVER_CANCER_DN;ACEVEDO_LIVER_CANCER_WITH_H3K27ME3_UP;ACEVEDO_LIVER_TUMOR_VS_NORMAL_ADJACENT_TISSUE_DN;BIOPOLYMER_METABOLIC_PROCESS;BLALOCK_ALZHEIMERS_DISEASE_UP;chr16q23;CREIGHTON_ENDOCRINE_THERAPY_RESISTANCE_3;DAVICIONI_MOLECULAR_ARMS_VS_ERMS_UP;DODD_NASOPHARYNGEAL_CARCINOMA_UP;FLECHNER_BIOPSY_KIDNEY_TRANSPLANT_OK_VS_DONOR_UP;GCM_MYST2;GRAESSMANN_APOPTOSIS_BY_DOXORUBICIN_UP;GRAESSMANN_R…	Completeproteome;Nucleus;Referenceproteome							+	+		+	7	7	7	82.9	82.9	82.9	0.935038	0	92199000000	625	10.2658	358420000	468960000	405990000	195320000	184650000	62704000	183660000	228100000	212510000	273540000	188060000	1881400	16135000	368270
P61957;H7BWX9;D3Z794	P61957;H7BWX9;D3Z794	Small ubiquitin-related modifier 2	Sumo2	yellow	grey	ubiquitin-proteasome-system	proteostasis	biological regulation;cellular macromolecule metabolic process;cellular metabolic process;cellular process;cellular protein metabolic process;macromolecule metabolic process;macromolecule modification;metabolic process;positive regulation of biological process;positive regulation of biosynthetic process;positive regulation of catabolic process;positive regulation of cellular biosynthetic process;…	acid-amino acid ligase activity;binding;catalytic activity;enzyme binding;ligase activity;ligase activity, forming carbon-nitrogen bonds;protein binding;small conjugating protein ligase activity;SUMO ligase activity;ubiquitin protein ligase binding	cell part;intracellular membrane-bounded organelle;intracellular organelle;intracellular organelle part;intracellular part;membrane-bounded organelle;nuclear body;nuclear part;nucleoplasm part;nucleus;organelle;organelle part;PML body	RNA transport	Rad60-SLD	AAAGGGA,MIR-204,MIR-211;AACTTT_UNKNOWN;ACCTGTTG_UNKNOWN;ACEVEDO_LIVER_CANCER_UP;ACEVEDO_NORMAL_TISSUE_ADJACENT_TO_LIVER_TUMOR_UP;BLALOCK_ALZHEIMERS_DISEASE_DN;BROWNE_HCMV_INFECTION_1HR_DN;BROWNE_HCMV_INFECTION_48HR_DN;BROWNE_HCMV_INFECTION_4HR_DN;BRUINS_UVC_RESPONSE_LATE;CAGCTG_V$AP4_Q5;chr17q25;CTGTTAC,MIR-194;DANG_REGULATED_BY_MYC_UP;DODD_NASOPHARYNGEAL_CARCINOMA_DN;GCCATNTTG_V$YY1_Q6;GCM_ACTG1…	Acetylation;Completeproteome;Isopeptidebond;Nucleus;Proteomicsidentification;Referenceproteome;Ublconjugation;Ublconjugationpathway								+			4	4	2	34.7	34.7	14.7	1.03627	0	304000000000	502	11.1825	655760000	776970000	67283000	52513000	285090000	290200000	160190000	197950000	71667000	507270000	266530000	8461300	14808000	5270100
P67984	P67984	60S ribosomal protein L22	Rpl22	yellow	grey	ribosomes	ribosomes	alpha-beta T cell activation;alpha-beta T cell differentiation;biosynthetic process;cell activation;cell differentiation;cellular biosynthetic process;cellular developmental process;cellular macromolecule biosynthetic process;cellular macromolecule metabolic process;cellular metabolic process;cellular process;cellular protein metabolic process;developmental process;immune system process;leukocyte…	binding;carbohydrate binding;glycosaminoglycan binding;heparin binding;pattern binding;polysaccharide binding;structural constituent of ribosome;structural molecule activity	adherens junction;anchoring junction;cell junction;cell part;cell-substrate adherens junction;cell-substrate junction;cytoplasm;cytoplasmic part;cytosolic large ribosomal subunit;extracellular membrane-bounded organelle;extracellular organelle;extracellular region part;extracellular vesicular exosome;focal adhesion;intracellular membrane-bounded organelle;intracellular non-membrane-bounded organe…	Ribosome	Ribosomal_L22e	BENPORATH_MYC_TARGETS_WITH_EBOX;BERENJENO_TRANSFORMED_BY_RHOA_DN;BILANGES_RAPAMYCIN_SENSITIVE_GENES;BIOSYNTHETIC_PROCESS;BOUDOUKHA_BOUND_BY_IGF2BP2;CACGTG_V$MYC_Q2;CAIRO_HEPATOBLASTOMA_CLASSES_UP;CELLULAR_BIOSYNTHETIC_PROCESS;CELLULAR_MACROMOLECULE_METABOLIC_PROCESS;CELLULAR_PROTEIN_METABOLIC_PROCESS;chr1p36;CTATGCA,MIR-153;DANG_BOUND_BY_MYC;DANG_MYC_TARGETS_UP;DODD_NASOPHARYNGEAL_CARCINOMA_DN;ES…	Completeproteome;Heparin-binding;Referenceproteome;Ribonucleoprotein;Ribosomalprotein;RNA-binding								+		+	9	9	7	69.5	69.5	62.5	1.16906	0	502000000000	699	11.0983	182090000	152550000	267480000	119340000	63175000	29763000	85432000	114230000	113520000	63095000	114520000	21874000	30764000	11032000
P84084	P84084	ADP-ribosylation factor 5	Arf5	yellow	grey	ribosomes	ribosomes	biological regulation;cellular process;cellular response to stimulus;establishment of localization;establishment of protein localization;intracellular signal transduction;protein transport;regulation of biological process;regulation of cellular process;response to stimulus;signal transduction;small GTPase mediated signal transduction;transport;vesicle-mediated transport	binding;GTP binding;guanyl nucleotide binding;guanyl ribonucleotide binding;nucleotide binding;purine nucleotide binding;purine ribonucleoside triphosphate binding;purine ribonucleotide binding;ribonucleotide binding	cell part;cytoplasm;cytoplasmic part;extracellular membrane-bounded organelle;extracellular organelle;extracellular region part;extracellular vesicular exosome;Golgi apparatus;intracellular membrane-bounded organelle;intracellular organelle;intracellular part;membrane;membrane-bounded organelle;membrane-bounded vesicle;organelle;perinuclear region of cytoplasm;plasma membrane;vesicle		Arf	BERENJENO_TRANSFORMED_BY_RHOA_DN;BLALOCK_ALZHEIMERS_DISEASE_DN;BONOME_OVARIAN_CANCER_SURVIVAL_OPTIMAL_DEBULKING;chr7q31;DAVICIONI_TARGETS_OF_PAX_FOXO1_FUSIONS_UP;DIRMEIER_LMP1_RESPONSE_LATE_DN;ESC_V6.5_UP_LATE.V1_UP;GGGCGGR_V$SP1_Q6;GGGTGGRR_V$PAX4_03;GSE13484_UNSTIM_VS_YF17D_VACCINE_STIM_PBMC_UP;GSE15930_STIM_VS_STIM_AND_IFNAB_72H_CD8_T_CELL_UP;GSE15930_STIM_VS_STIM_AND_TRICHOSTATINA_24H_CD8_T_C…	Completeproteome;Cytoplasm;ER-Golgitransport;Golgiapparatus;GTP-binding;Lipoprotein;Myristate;Nucleotide-binding;Proteintransport;Referenceproteome;Transport								+		+	19	11	10	85	51.7	43.9	1.31237	0	217000000000	923	10.2955	213390000	278830000	180680000	91110000	93528000	49340000	40076000	101060000	96693000	88139000	126120000	2123100	680790	1119600
Q8K1L5	Q8K1L5	Protein phosphatase 1 regulatory subunit 11	Ppp1r11	yellow	grey	phosphatase inhibitor	signal transduction	biological regulation;negative regulation of biological process;negative regulation of catalytic activity;negative regulation of cellular metabolic process;negative regulation of cellular process;negative regulation of cellular protein metabolic process;negative regulation of dephosphorylation;negative regulation of hydrolase activity;negative regulation of macromolecule metabolic process;negativ…	binding;enzyme binding;enzyme inhibitor activity;enzyme regulator activity;phosphatase binding;phosphatase inhibitor activity;phosphatase regulator activity;protein binding;protein phosphatase 1 binding;protein phosphatase binding;protein phosphatase inhibitor activity;protein phosphatase regulator activity;protein serine/threonine phosphatase inhibitor activity	cell part;cytoplasm;intracellular membrane-bounded organelle;intracellular organelle;intracellular part;membrane-bounded organelle;nucleus;organelle		PPI_Ypi1	BENPORATH_SOX2_TARGETS;BLALOCK_ALZHEIMERS_DISEASE_DN;BLUM_RESPONSE_TO_SALIRASIB_UP;BRUINS_UVC_RESPONSE_EARLY_LATE;CACTGCC,MIR-34A,MIR-34C,MIR-449;CACTGTG,MIR-128A,MIR-128B;CAGCACT,MIR-512-3P;CAGCCTC,MIR-485-5P;CELL_FRACTION;chr6p21;DAIRKEE_TERT_TARGETS_UP;ENK_UV_RESPONSE_KERATINOCYTE_UP;GSE11864_CSF1_VS_CSF1_IFNG_PAM3CYS_IN_MAC_DN;GSE11864_UNTREATED_VS_CSF1_PAM3CYS_IN_MAC_DN;GSE12845_IGD_NEG_BLOO…	Acetylation;Completeproteome;Phosphoprotein;Proteinphosphataseinhibitor;Referenceproteome					+					+	9	9	2	58	58	22.9	1.16268	0	341000000000	332	10.9313	1000100000	815140000	1074300000	735800000	175030000	99638000	617220000	0	1130900000	1797300000	510480000	1804300	9061100	0
O70456	O70456	14-3-3 protein sigma	Sfn	yellow	grey	signal transduction	signal transduction	anatomical structure development;apoptotic mitochondrial changes;biological regulation;cell development;cell differentiation;cellular component organization;cellular component organization at cellular level;cellular component organization or biogenesis;cellular component organization or biogenesis at cellular level;cellular developmental process;cellular process;cellular response to stimulus;cell…	binding;enzyme binding;kinase binding;phosphoprotein binding;protein binding;protein kinase binding	cell part;cytoplasm;cytoplasmic part;cytoplasmic vesicle membrane;cytoplasmic vesicle part;cytosol;extracellular membrane-bounded organelle;extracellular organelle;extracellular region part;extracellular vesicular exosome;intracellular membrane-bounded organelle;intracellular organelle;intracellular organelle part;intracellular part;membrane;membrane-bounded organelle;membrane-bounded vesicle;nuc…	Aldosterone-regulated sodium reabsorption;Cell cycle;p53 signaling pathway	14-3-3	AAGWWRNYGGC_UNKNOWN;AFFAR_YY1_TARGETS_UP;AIGNER_ZEB1_TARGETS;AMIT_EGF_RESPONSE_480_HELA;APOPTOSIS_GO;APOPTOTIC_MITOCHONDRIAL_CHANGES;APOPTOTIC_PROGRAM;APRELIKOVA_BRCA1_TARGETS;BASAKI_YBX1_TARGETS_UP;BILD_HRAS_ONCOGENIC_SIGNATURE;BLALOCK_ALZHEIMERS_DISEASE_INCIPIENT_UP;BLALOCK_ALZHEIMERS_DISEASE_UP;BOYAULT_LIVER_CANCER_SUBCLASS_G23_UP;CAGGTG_V$E12_Q6;CCAWYNNGAAR_UNKNOWN;CCTGTGA,MIR-513;CELL_DEVELO…	Completeproteome;Cytoplasm;Directproteinsequencing;Nucleus;Phosphoprotein;Referenceproteome;Secreted;Ublconjugation											12	6	6	34.7	25	25	1.44257	0	504000000000	370	10.4985	215330000	266730000	18313000	18991000	310720000	160290000	28957000	66534000	15401000	186960000	198440000	1556300	8133600	11140000
P68510	P68510	14-3-3 protein eta	Ywhah	yellow	grey	signal transduction	signal transduction	anatomical structure development;biological regulation;C21-steroid hormone catabolic process;C21-steroid hormone metabolic process;catabolic process;cellular component organization;cellular component organization at cellular level;cellular component organization or biogenesis;cellular component organization or biogenesis at cellular level;cellular hormone metabolic process;cellular metabolic proc…	actin binding;binding;channel regulator activity;cytoskeletal protein binding;enzyme binding;glucocorticoid receptor binding;hormone receptor binding;ion channel binding;nuclear hormone receptor binding;protein binding;protein dimerization activity;protein domain specific binding;protein heterodimerization activity;receptor binding;sodium channel regulator activity;steroid hormone receptor binding	cell junction;cell part;cell-cell contact zone;cell-cell junction;cytoplasm;cytoplasmic part;cytoplasmic vesicle membrane;cytoplasmic vesicle part;cytosol;extracellular membrane-bounded organelle;extracellular organelle;extracellular region part;extracellular vesicular exosome;intercalated disc;intracellular organelle part;intracellular part;membrane;membrane-bounded organelle;membrane-bounded ve…	Cell cycle;Neurotrophin signaling pathway;Oocyte meiosis	14-3-3	AGUIRRE_PANCREATIC_CANCER_COPY_NUMBER_DN;ANATOMICAL_STRUCTURE_DEVELOPMENT;ANATOMICAL_STRUCTURE_MORPHOGENESIS;ATGCTGC,MIR-103,MIR-107;BANDRES_RESPONSE_TO_CARMUSTIN_MGMT_48HR_DN;BANDRES_RESPONSE_TO_CARMUSTIN_WITHOUT_MGMT_48HR_DN;BASAKI_YBX1_TARGETS_UP;BENPORATH_CYCLING_GENES;BENPORATH_MYC_MAX_TARGETS;BIOCARTA_ACH_PATHWAY;BIOCARTA_AKT_PATHWAY;BIOCARTA_BAD_PATHWAY;BIOCARTA_CHREBP2_PATHWAY;BIOCARTA_G2…	Acetylation;Completeproteome;Cytoplasm;Directproteinsequencing;Nitration;Phosphoprotein;Referenceproteome	B-Ksr1-MEK-MAPK-14-3-3 complex;Ksr1 complex (Ksr1, Mek, 14-3-3), unstimulated;Ksr1 complex (Ksr1, Mek, 14-3-3, Mapk), EGF stimulated;Ksr1-CK2-MEK-14-3-3 complex, PDGF treated							+			32	23	23	92.3	84.6	84.6	1.45042	0	2090000000000	4029	11.1162	1143100000	1372000000	158020000	167900000	503220000	225460000	217680000	312090000	314390000	626650000	413010000	2661400	4003200	3578400
G3X9V7;Q3TEG0	G3X9V7		A830010M20Rik	yellow	grey	NaN	unknown							Completeproteome;Proteomicsidentification;Referenceproteome								+		+	51	51	1	58	58	1.2	2.06934	0	49556000000	784	8.97082	22151000	20641000	10907000	6364300	5008400	2312200	8379600	3216500	6955800	2689000	5593000	0	0	0
Q9CZJ2	Q9CZJ2	Heat shock 70 kDa protein 12B	Hspa12b	green	grey	chaperone	not shown		adenyl nucleotide binding;adenyl ribonucleotide binding;ATP binding;binding;nucleotide binding;purine nucleotide binding;purine ribonucleoside triphosphate binding;purine ribonucleotide binding;ribonucleotide binding				chr20p13;CTTTGT_V$LEF1_Q2;GGGTGGRR_V$PAX4_03;GSE20366_CD103_POS_VS_NEG_TREG_KLRG1NEG_DN;GSE27786_LSK_VS_CD8_TCELL_UP;GSE36392_TYPE_2_MYELOID_VS_NEUTROPHIL_IL25_TREATED_LUNG_UP;IWANAGA_CARCINOGENESIS_BY_KRAS_DN;JIANG_HYPOXIA_CANCER;LEE_BMP2_TARGETS_UP;MIKKELSEN_ES_ICP_WITH_H3K4ME3_AND_H3K27ME3;NIKOLSKY_BREAST_CANCER_20P13_AMPLICON;PEDRIOLI_MIR31_TARGETS_DN;ZWANG_TRANSIENTLY_UP_BY_2ND_EGF_PULSE_ONLY	ATP-binding;Completeproteome;Directproteinsequencing;Nucleotide-binding;Phosphoprotein;Referenceproteome								+			33	30	26	57.8	54.7	47.2	1.88149	0	74044000000	517	9.25669	11419000	14435000	16116000	6411000	22384000	5068800	16787000	13788000	12886000	8119200	5997600	15778000	19857000	2475400
Q80V62;F7CAP1	Q80V62	Fanconi anemia group D2 protein homolog	Fancd2	green	grey	chromosomal stability	not shown	cell cycle process;cellular component organization;cellular component organization at cellular level;cellular component organization or biogenesis;cellular component organization or biogenesis at cellular level;cellular macromolecule metabolic process;cellular metabolic process;cellular nitrogen compound metabolic process;cellular process;cellular response to stimulus;cellular response to stress;…	binding;DNA polymerase binding;enzyme binding;protein binding	cell part;chromosome;condensed chromosome;cytoplasmic part;Golgi apparatus;intracellular membrane-bounded organelle;intracellular non-membrane-bounded organelle;intracellular organelle;intracellular organelle part;intracellular part;membrane-bounded organelle;non-membrane-bounded organelle;nuclear part;nucleoplasm;nucleus;organelle;organelle part		FancD2	BENPORATH_CYCLING_GENES;BIOCARTA_ATRBRCA_PATHWAY;chr3p25;DUTERTRE_ESTRADIOL_RESPONSE_24HR_UP;FERREIRA_EWINGS_SARCOMA_UNSTABLE_VS_STABLE_UP;FORTSCHEGGER_PHF8_TARGETS_DN;FUJII_YBX1_TARGETS_DN;GOBERT_OLIGODENDROCYTE_DIFFERENTIATION_UP;GRESHOCK_CANCER_COPY_NUMBER_UP;GSE11864_CSF1_IFNG_VS_CSF1_PAM3CYS_IN_MAC_UP;GSE14308_TH1_VS_NATURAL_TREG_UP;GSE14308_TH17_VS_NATURAL_TREG_UP;GSE14308_TH2_VS_NATURAL_TR…	3D-structure;Alternativesplicing;Cellcycle;Completeproteome;Developmentalprotein;DNAdamage;DNArepair;Isopeptidebond;Nucleus;Phosphoprotein;Referenceproteome;Ublconjugation										+	11	11	11	9.2	9.2	9.2	2.21384	9.08e-05	3619000000	61	7.70126	0	0	0	0	63488	0	100860	27343	0	199200	117120	551420	1479400	936620
Q8R0J2;E9PVP3;Q5F2B1;Q9R0Q9;F6XX36;F6ZGG4	Q8R0J2;E9PVP3;Q5F2B1;Q9R0Q9;F6XX36	Mannose-P-dolichol utilization defect 1 protein	Mpdu1	green	grey	ER-associated	not shown	biosynthetic process;carbohydrate biosynthetic process;carbohydrate metabolic process;dolichol-linked oligosaccharide biosynthetic process;establishment of localization;metabolic process;oligosaccharide biosynthetic process;oligosaccharide metabolic process;primary metabolic process;transport		cell part;cytoplasmic part;endoplasmic reticulum;extracellular membrane-bounded organelle;extracellular organelle;extracellular region part;extracellular vesicular exosome;integral to membrane;intracellular membrane-bounded organelle;intracellular organelle;intracellular part;intrinsic to membrane;membrane;membrane part;membrane-bounded organelle;membrane-bounded vesicle;mitochondrion;organelle;v…		PQ-loop	ACEVEDO_LIVER_CANCER_DN;BIOPOLYMER_METABOLIC_PROCESS;BIOPOLYMER_MODIFICATION;BIOSYNTHETIC_PROCESS;BROWNE_HCMV_INFECTION_1HR_DN;BROWNE_HCMV_INFECTION_20HR_UP;BROWNE_HCMV_INFECTION_4HR_DN;BURTON_ADIPOGENESIS_6;CARBOHYDRATE_BIOSYNTHETIC_PROCESS;CARBOHYDRATE_METABOLIC_PROCESS;CELLULAR_MACROMOLECULE_METABOLIC_PROCESS;CELLULAR_PROTEIN_METABOLIC_PROCESS;chr17p13;DACOSTA_UV_RESPONSE_VIA_ERCC3_TTD_UP;DACO…	Acetylation;Completeproteome;Membrane;Proteomicsidentification;Referenceproteome;Repeat;Transmembrane;Transmembranehelix;Transport								+			4	4	4	17.4	17.4	17.4	1.42223	0	106000000000	389	10.2487	11658000	13828000	6587200	15738000	23377000	13503000	15478000	28338000	15319000	12012000	13430000	42435000	34038000	27901000
Q61147;E9PZD8;G3UXG1;G3UWP5;G3UZ53	Q61147;E9PZD8	Ceruloplasmin	Cp	green	grey	ferroxidase, iron metabolism	not shown	biological regulation;cation homeostasis;cation transport;cellular cation homeostasis;cellular chemical homeostasis;cellular homeostasis;cellular ion homeostasis;cellular iron ion homeostasis;cellular metal ion homeostasis;cellular process;chemical homeostasis;copper ion transport;establishment of localization;homeostatic process;ion homeostasis;ion transport;iron ion homeostasis;metabolic proces…	binding;catalytic activity;cation binding;chaperone binding;copper ion binding;ferroxidase activity;ion binding;metal ion binding;oxidoreductase activity;oxidoreductase activity, oxidizing metal ions;oxidoreductase activity, oxidizing metal ions, oxygen as acceptor;protein binding;transition metal ion binding	blood microparticle;cell part;cytoplasmic part;extracellular membrane-bounded organelle;extracellular organelle;extracellular region part;extracellular space;extracellular vesicular exosome;intracellular organelle part;intracellular part;lysosomal membrane;membrane;membrane-bounded organelle;membrane-bounded vesicle;organelle;organelle membrane;organelle part;vacuolar membrane;vacuolar part;vesic…	Porphyrin and chlorophyll metabolism	Cu-oxidase;Cu-oxidase_2;Cu-oxidase_3	AACTTT_UNKNOWN;ACEVEDO_FGFR1_TARGETS_IN_PROSTATE_CANCER_MODEL_UP;BERENJENO_ROCK_SIGNALING_NOT_VIA_RHOA_UP;BLALOCK_ALZHEIMERS_DISEASE_UP;BONOME_OVARIAN_CANCER_SURVIVAL_OPTIMAL_DEBULKING;BOYLAN_MULTIPLE_MYELOMA_C_D_DN;BOYLAN_MULTIPLE_MYELOMA_PCA1_UP;BYSTRYKH_HEMATOPOIESIS_STEM_CELL_QTL_TRANS;CAHOY_ASTROGLIAL;CAIRO_HEPATOBLASTOMA_DN;CATION_HOMEOSTASIS;CELLULAR_CATION_HOMEOSTASIS;CELLULAR_HOMEOSTASIS…	Completeproteome;Copper;Coppertransport;Disulfidebond;Glycoprotein;Iontransport;Metal-binding;Oxidoreductase;Proteomicsidentification;Referenceproteome;Repeat;Secreted;Signal;Transport								+		+	54	54	1	56.6	56.6	1.1	2.08332	0	135000000000	1060	9.42187	10567000	3234700	4202700	3299000	2303900	533860	7326900	2712900	3402900	2282700	1974900	1598500	3921800	2342700
E9Q9D5;E9Q9D5-1;E9Q9D5-3;E9PZU3;E9Q0F8;F6Y6I9;E9Q473;E9Q8G6	E9Q9D5;E9Q9D5-1;E9Q9D5-3		Rabl2	green	grey	GTPase	not shown	anatomical structure formation involved in morphogenesis;biological regulation;cell motility;cell projection assembly;cell projection organization;cellular component assembly;cellular component assembly at cellular level;cellular component assembly involved in morphogenesis;cellular component movement;cellular component organization;cellular component organization at cellular level;cellular compo…	binding;catalytic activity;GTP binding;GTPase activity;guanyl nucleotide binding;guanyl ribonucleotide binding;hydrolase activity;hydrolase activity, acting on acid anhydrides;hydrolase activity, acting on acid anhydrides, in phosphorus-containing anhydrides;nucleoside-triphosphatase activity;nucleotide binding;purine nucleotide binding;purine ribonucleoside triphosphate binding;purine ribonucleo…	axoneme part;cell part;cell projection part;endomembrane system;intracellular part;intraflagellar transport particle B;macromolecular complex;organelle part;protein complex		Ras		Alternativesplicing;Completeproteome;GTP-binding;Nucleotide-binding;Proteomicsidentification;Referenceproteome											14	14	14	63.7	63.7	63.7	1.40841	0	10244000000	186	8.83439	497950	249110	0	712790	445530	0	61362000	1129400	243720	105700	75322	59871000	164270	112520
P23198;Q9DCC5;D3Z313;D3Z1A9	P23198;Q9DCC5;D3Z313	Chromobox protein homolog 3	Cbx3	green	grey	heterochromatin	not shown	biological regulation;biosynthetic process;cellular biosynthetic process;cellular component organization;cellular component organization at cellular level;cellular component organization or biogenesis;cellular component organization or biogenesis at cellular level;cellular macromolecule biosynthetic process;cellular macromolecule metabolic process;cellular metabolic process;cellular nitrogen comp…	binding;DNA binding;enzyme binding;identical protein binding;nucleic acid binding;protein binding;protein domain specific binding;regulatory region DNA binding;regulatory region nucleic acid binding;sequence-specific DNA binding;transcription regulatory region DNA binding;transcription regulatory region sequence-specific DNA binding	cell part;centromeric heterochromatin;chromatin;chromocenter;chromosomal part;chromosome, centromeric region;condensed chromosome, centromeric region;cytoskeletal part;envelope;euchromatin;heterochromatin;intracellular membrane-bounded organelle;intracellular non-membrane-bounded organelle;intracellular organelle;intracellular organelle part;intracellular part;membrane-bounded organelle;non-membr…		Chromo;Chromo_shadow	ACTTTAT,MIR-142-5P;BENPORATH_CYCLING_GENES;BENPORATH_NANOG_TARGETS;BENPORATH_SOX2_TARGETS;BHATI_G2M_ARREST_BY_2METHOXYESTRADIOL_UP;BILD_CTNNB1_ONCOGENIC_SIGNATURE;BLUM_RESPONSE_TO_SALIRASIB_DN;BORCZUK_MALIGNANT_MESOTHELIOMA_UP;BOYAULT_LIVER_CANCER_SUBCLASS_G3_UP;BYSTROEM_CORRELATED_WITH_IL5_UP;CAIRO_HEPATOBLASTOMA_CLASSES_UP;chr7p21;CHROMATIN_BINDING;CTTTGT_V$LEF1_Q2;CTTTGTA,MIR-524;DANG_BOUND_BY…	Acetylation;Biologicalrhythms;Chromatinregulator;Completeproteome;Directproteinsequencing;Nucleus;Phosphoprotein;Proteomicsidentification;Referenceproteome;Repeat;Repressor;Transcription;Transcriptionregulation							+	+		+	11	10	9	50.3	43.7	35	1.31921	0	968000000000	2075	11.1407	89769000	153580000	40667000	16948000	38732000	26641000	48055000	60225000	56131000	71160000	51243000	34104000	80223000	111450000
P01899;V9GXI3;G3UX20;G3UZP7;F6VXI7;A7VMS3	P01899	H-2 class I histocompatibility antigen, D-B alpha chain	H2-D1	green	grey	immune function	not shown	antigen processing and presentation;antigen processing and presentation of endogenous antigen;antigen processing and presentation of endogenous peptide antigen;antigen processing and presentation of endogenous peptide antigen via MHC class I;antigen processing and presentation of endogenous peptide antigen via MHC class I via ER pathway;antigen processing and presentation of endogenous peptide an…	antigen binding;beta-2-microglobulin binding;binding;peptide antigen binding;peptide binding;protein binding;protein complex binding;receptor binding;T cell receptor binding;TAP binding	cell part;cell surface;cytoplasm;cytoplasmic part;cytoplasmic vesicle membrane;cytoplasmic vesicle part;endocytic vesicle membrane;endoplasmic reticulum;endoplasmic reticulum exit site;endoplasmic reticulum part;external side of plasma membrane;extracellular membrane-bounded organelle;extracellular organelle;extracellular region part;extracellular vesicular exosome;Golgi apparatus;Golgi apparatus…	Allograft rejection;Antigen processing and presentation;Autoimmune thyroid disease;Cell adhesion molecules (CAMs);Endocytosis;Graft-versus-host disease;Natural killer cell mediated cytotoxicity;Phagosome;Type I diabetes mellitus;Viral myocarditis	C1-set;MHC_I;MHC_I_C		3D-structure;Completeproteome;Directproteinsequencing;Disulfidebond;Glycoprotein;Immunity;Membrane;MHCI;Phosphoprotein;Referenceproteome;Signal;Transmembrane;Transmembranehelix;Ublconjugation								+			22	22	4	50.6	50.6	12.4	1.61104	0	265000000000	715	10.0806	1451400	2110100	496570	1968600	1860700	663950	926640	3195400	6026100	1390900	2461400	2050600	2057600	1318100
Q8BKX1-4	Q8BKX1-4	Brain-specific angiogenesis inhibitor 1-associated protein 2	Baiap2	green	grey	insulin receptor, signal transduction	not shown	actin crosslink formation;actin cytoskeleton organization;actin filament bundle assembly;actin filament organization;actin filament-based process;anatomical structure development;biological regulation;cell projection organization;cell surface receptor linked signaling pathway;cellular component assembly;cellular component assembly at cellular level;cellular component organization;cellular compone…	binding;binding, bridging;cytoskeletal adaptor activity;cytoskeletal protein binding;identical protein binding;proline-rich region binding;protein binding;protein binding, bridging	actin cytoskeleton;cell part;cell projection;cytoplasm;cytoplasmic part;cytoskeleton;cytosol;extracellular membrane-bounded organelle;extracellular organelle;extracellular region part;extracellular vesicular exosome;filopodium;intracellular non-membrane-bounded organelle;intracellular organelle;intracellular organelle part;intracellular part;membrane;membrane-bounded organelle;membrane-bounded ve…	Adherens junction;Regulation of actin cytoskeleton	IMD;SH3_9	AGGAAGC,MIR-516-3P;ANATOMICAL_STRUCTURE_DEVELOPMENT;ANATOMICAL_STRUCTURE_MORPHOGENESIS;AXONOGENESIS;BANDRES_RESPONSE_TO_CARMUSTIN_MGMT_48HR_DN;BENPORATH_CYCLING_GENES;BENPORATH_EED_TARGETS;BIOCARTA_RHO_PATHWAY;BONOME_OVARIAN_CANCER_SURVIVAL_SUBOPTIMAL_DEBULKING;CACCAGC,MIR-138;CAGCTG_V$AP4_Q5;CAGGGTC,MIR-504;CCAGGGG,MIR-331;CCTGTGA,MIR-513;CELL_DEVELOPMENT;CELL_SURFACE_RECEPTOR_LINKED_SIGNAL_TRAN…	Alternativesplicing;Cellprojection;Coiledcoil;Completeproteome;Cytoplasm;Cytoskeleton;Membrane;Phosphoprotein;Referenceproteome;SH3domain								+			45	2	2	84.2	6.2	6.2	1.72652	0	15405000000	155	8.66914	1941800	1982800	2774800	2233100	6288700	4366300	8029100	6808000	885780	2111400	864220	3551200	4418600	4234400
Q925N2	Q925N2	Sideroflexin-2	Sfxn2	green	grey	iron transporter	not shown	biological regulation;cation homeostasis;chemical homeostasis;homeostatic process;ion homeostasis;iron ion homeostasis;regulation of biological quality	ion transmembrane transporter activity;substrate-specific transmembrane transporter activity;substrate-specific transporter activity;transmembrane transporter activity;transporter activity	cell part;cytoplasmic part;integral to membrane;intracellular membrane-bounded organelle;intracellular organelle;intracellular organelle part;intracellular part;intrinsic to membrane;membrane;membrane part;membrane-bounded organelle;mitochondrial inner membrane;mitochondrial membrane;mitochondrial part;mitochondrion;organelle;organelle inner membrane;organelle membrane;organelle part		Mtc	AACTTT_UNKNOWN;ACCAAAG,MIR-9;ACEVEDO_LIVER_TUMOR_VS_NORMAL_ADJACENT_TISSUE_UP;CACGTG_V$MYC_Q2;chr10q24;CREIGHTON_ENDOCRINE_THERAPY_RESISTANCE_1;CTTTAAR_UNKNOWN;CTTTGA_V$LEF1_Q2;DUTERTRE_ESTRADIOL_RESPONSE_24HR_UP;DUTERTRE_ESTRADIOL_RESPONSE_6HR_UP;ENGELMANN_CANCER_PROGENITORS_DN;GATTGGY_V$NFY_Q6_01;GCAAGGA,MIR-502;GGGCGGR_V$SP1_Q6;GOBERT_OLIGODENDROCYTE_DIFFERENTIATION_UP;GOZGIT_ESR1_TARGETS_DN;G…	Acetylation;Completeproteome;Iontransport;Iron;Irontransport;Membrane;Mitochondrion;Referenceproteome;Transmembrane;Transmembranehelix;Transport								+			11	11	11	40.4	40.4	40.4	1.558	0	8241300000	141	8.68554	447370	0	0	0	166110	2184000	270570	0	0	1470000	0	984650	5226100	496580
Q9CPX8	Q9CPX8	Cytochrome b-c1 complex subunit 10	Uqcr11	green	grey	mitochondria	not shown		catalytic activity;cation transmembrane transporter activity;electron carrier activity;hydrogen ion transmembrane transporter activity;inorganic cation transmembrane transporter activity;ion transmembrane transporter activity;monovalent inorganic cation transmembrane transporter activity;oxidoreductase activity;oxidoreductase activity, acting on diphenols and related substances as donors;oxidored…	cell part;cytoplasmic part;integral to membrane;intracellular membrane-bounded organelle;intracellular organelle;intracellular organelle part;intracellular part;intrinsic to membrane;membrane;membrane part;membrane-bounded organelle;mitochondrial inner membrane;mitochondrial membrane;mitochondrial part;mitochondrion;organelle;organelle inner membrane;organelle membrane;organelle part;respiratory …	Alzheimer's disease;Cardiac muscle contraction;Huntington's disease;Oxidative phosphorylation;Parkinson's disease	UCR_6-4kD	BLALOCK_ALZHEIMERS_DISEASE_DN;BURTON_ADIPOGENESIS_5;CHICAS_RB1_TARGETS_LOW_SERUM;chr19p13;DAIRKEE_TERT_TARGETS_UP;ELECTRON_CARRIER_ACTIVITY;GSE13411_NAIVE_VS_IGM_MEMORY_BCELL_DN;GSE13411_NAIVE_VS_MEMORY_BCELL_DN;GSE14000_TRANSLATED_RNA_VS_MRNA_4H_LPS_DC_DN;GSE1460_DP_THYMOCYTE_VS_THYMIC_STROMAL_CELL_DN;GSE15930_NAIVE_VS_48H_IN_VITRO_STIM_CD8_TCELL_DN;GSE15930_NAIVE_VS_48H_IN_VITRO_STIM_IL12_CD8_T…	Completeproteome;Electrontransport;Membrane;Mitochondrion;Mitochondrioninnermembrane;Referenceproteome;Respiratorychain;Transmembrane;Transmembranehelix;Transport	Cytochrome bc1-complex (EC 1.10.2.2), mitochondrial			+	+			+			3	3	3	64.3	64.3	64.3	0.815485	0	100000000000	216	10.7007	343310000	413050000	515490000	392040000	636320000	348820000	445840000	835410000	259580000	1567900000	237030000	666430000	963720000	391120000
P00405;Q7JCZ1	P00405;Q7JCZ1	Cytochrome c oxidase subunit 2	Mtco2;mt-Co2	green	grey	mitochondria	not shown	cellular metabolic process;cellular process;electron transport chain;generation of precursor metabolites and energy;metabolic process;oxidation-reduction process	binding;catalytic activity;cation binding;cation transmembrane transporter activity;copper ion binding;cytochrome-c oxidase activity;heme-copper terminal oxidase activity;hydrogen ion transmembrane transporter activity;inorganic cation transmembrane transporter activity;ion binding;ion transmembrane transporter activity;metal ion binding;monovalent inorganic cation transmembrane transporter activ…	cell part;cytoplasmic part;extracellular membrane-bounded organelle;extracellular organelle;extracellular region part;extracellular vesicular exosome;integral to membrane;intracellular membrane-bounded organelle;intracellular organelle;intracellular organelle part;intracellular part;intrinsic to membrane;macromolecular complex;membrane;membrane part;membrane-bounded organelle;membrane-bounded ves…	Alzheimer's disease;Cardiac muscle contraction;Huntington's disease;Oxidative phosphorylation;Parkinson's disease	COX2;COX2_TM		Completeproteome;Copper;Directproteinsequencing;Electrontransport;Membrane;Metal-binding;Mitochondrion;Mitochondrioninnermembrane;Oxidoreductase;Referenceproteome;Respiratorychain;Transmembrane;Transmembranehelix;Transport	Cytochrome c oxidase (EC 1.9.3.1), mitochondrial							+			10	10	10	48	48	48	1.41457	0	2510000000000	4489	11.4968	1685500000	1684200000	1662100000	1262200000	3213700000	1542500000	2406300000	2713800000	1509700000	2105800000	956210000	1731200000	1701600000	1099500000
P53395	P53395	Lipoamide acyltransferase component of branched-chain alpha-keto acid dehydrogenase complex, mitochondrial	Dbt	green	grey	mitochondria	not shown		catalytic activity;dihydrolipoyllysine-residue (2-methylpropanoyl)transferase activity;transferase activity;transferase activity, transferring acyl groups;transferase activity, transferring acyl groups other than amino-acyl groups	cell part;cytoplasmic part;intracellular membrane-bounded organelle;intracellular non-membrane-bounded organelle;intracellular organelle;intracellular organelle part;intracellular part;membrane-bounded organelle;mitochondrial nucleoid;mitochondrial part;mitochondrion;non-membrane-bounded organelle;nucleoid;organelle;organelle part	Valine, leucine and isoleucine degradation	2-oxoacid_dh;Biotin_lipoyl;E3_binding	BURTON_ADIPOGENESIS_6;CHEMNITZ_RESPONSE_TO_PROSTAGLANDIN_E2_DN;chr1p31;CUI_TCF21_TARGETS_2_DN;CYTOPLASM;CYTOPLASMIC_PART;FULCHER_INFLAMMATORY_RESPONSE_LECTIN_VS_LPS_DN;GAL_LEUKEMIC_STEM_CELL_UP;GEORGES_TARGETS_OF_MIR192_AND_MIR215;GRAESSMANN_APOPTOSIS_BY_DOXORUBICIN_UP;GRAESSMANN_APOPTOSIS_BY_SERUM_DEPRIVATION_UP;GRAESSMANN_RESPONSE_TO_MC_AND_DOXORUBICIN_UP;GSE13738_RESTING_VS_TCR_ACTIVATED_CD4_T…	Acetylation;Acyltransferase;Completeproteome;Lipoyl;Mitochondrion;Phosphoprotein;Referenceproteome;Transferase;Transitpeptide								+			35	35	35	77.8	77.8	77.8	1.72629	0	270000000000	2011	9.96901	33873000	37995000	28976000	25153000	33434000	18747000	33857000	26933000	36352000	22277000	16618000	36428000	40400000	30259000
Q06185;Q8BTB6	Q06185	ATP synthase subunit e, mitochondrial	Atp5i	green	grey	mitochondria	not shown	ATP biosynthetic process;ATP metabolic process;ATP synthesis coupled proton transport;biosynthetic process;cation transport;cellular biosynthetic process;cellular metabolic process;cellular nitrogen compound biosynthetic process;cellular nitrogen compound metabolic process;cellular process;energy coupled proton transport, down electrochemical gradient;establishment of localization;heterocycle bio…	ATPase activity;catalytic activity;cation transmembrane transporter activity;hydrogen ion transmembrane transporter activity;hydrolase activity;hydrolase activity, acting on acid anhydrides;hydrolase activity, acting on acid anhydrides, in phosphorus-containing anhydrides;inorganic cation transmembrane transporter activity;ion transmembrane transporter activity;monovalent inorganic cation transme…	cell part;cytoplasmic part;intracellular membrane-bounded organelle;intracellular organelle;intracellular organelle part;intracellular part;macromolecular complex;membrane part;membrane-bounded organelle;mitochondrial membrane part;mitochondrial part;mitochondrial proton-transporting ATP synthase complex;mitochondrial proton-transporting ATP synthase complex, coupling factor F(o);mitochondrion;or…	Oxidative phosphorylation	ATP-synt_E	CHICAS_RB1_TARGETS_LOW_SERUM;DAZARD_RESPONSE_TO_UV_NHEK_UP;DAZARD_UV_RESPONSE_CLUSTER_G1;GSE10325_BCELL_VS_LUPUS_BCELL_DN;GSE13484_UNSTIM_VS_12H_YF17D_VACCINE_STIM_PBMC_UP;GSE14769_UNSTIM_VS_120MIN_LPS_BMDM_UP;GSE14769_UNSTIM_VS_60MIN_LPS_BMDM_UP;GSE15324_ELF4_KO_VS_WT_ACTIVATED_CD8_TCELL_DN;GSE17580_UNINFECTED_VS_S_MANSONI_INF_TREG_DN;GSE17721_0.5H_VS_24H_LPS_BMDM_UP;GSE17721_0.5H_VS_8H_GARDIQUI…	Acetylation;ATPsynthesis;CF(0);Completeproteome;Directproteinsequencing;Hydrogeniontransport;Iontransport;Membrane;Mitochondrion;Mitochondrioninnermembrane;Proteomicsidentification;Referenceproteome;Transport								+			13	13	13	91.5	91.5	91.5	0.91569	0	586000000000	2538	11.2905	698660000	1420600000	722050000	514580000	1941300000	527980000	521130000	667390000	370540000	859900000	756390000	575220000	766350000	744000000
Q80UN9;Q80UN9-2	Q80UN9;Q80UN9-2	tRNA dimethylallyltransferase, mitochondrial	Trit1	green	grey	mitochondria, translation	not shown	cellular macromolecule metabolic process;cellular metabolic process;cellular nitrogen compound metabolic process;cellular process;macromolecule metabolic process;macromolecule modification;metabolic process;ncRNA metabolic process;ncRNA processing;nitrogen compound metabolic process;nucleic acid metabolic process;nucleobase-containing compound metabolic process;primary metabolic process;RNA metab…	adenyl nucleotide binding;adenyl ribonucleotide binding;ATP binding;binding;catalytic activity;cation binding;ion binding;metal ion binding;nucleotide binding;purine nucleotide binding;purine ribonucleoside triphosphate binding;purine ribonucleotide binding;ribonucleotide binding;transferase activity;transferase activity, transferring alkyl or aryl (other than methyl) groups;tRNA dimethylallyltra…	cell part;cytoplasmic part;intracellular membrane-bounded organelle;intracellular organelle;intracellular part;membrane-bounded organelle;mitochondrion;nucleus;organelle	Zeatin biosynthesis	IPPT;zf-C2H2_jaz	ACEVEDO_LIVER_CANCER_UP;ACEVEDO_NORMAL_TISSUE_ADJACENT_TO_LIVER_TUMOR_UP;AGCTCCT,MIR-28;BENPORATH_SOX2_TARGETS;CAGCAGG,MIR-370;CAGCTG_V$AP4_Q5;chr1p34;GCANCTGNY_V$MYOD_Q6;GSE11864_CSF1_IFNG_VS_CSF1_IFNG_PAM3CYS_IN_MAC_UP;GSE12366_PLASMA_CELL_VS_MEMORY_BCELL_DN;GSE13306_RA_VS_UNTREATED_TCONV_DN;GSE14000_UNSTIM_VS_16H_LPS_DC_TRANSLATED_RNA_UP;GSE14000_UNSTIM_VS_16H_LPS_DC_UP;GSE14308_TH17_VS_NAIVE_…	Alternativesplicing;ATP-binding;Completeproteome;Cytoplasm;Metal-binding;Mitochondrion;Nucleotide-binding;Nucleus;Phosphoprotein;Referenceproteome;Transferase;Transitpeptide;tRNAprocessing;Zinc;Zinc-finger								+			10	10	9	27.6	27.6	25.9	1.71963	0	7442600000	138	8.42457	486870	0	71177	70427	37908	0	0	154620	0	0	105220	291250	65199000	120840
Q8BG73	Q8BG73	SH3 domain-binding glutamic acid-rich-like protein 2	Sh3bgrl2	green	grey	NaN	not shown			cell part;extracellular membrane-bounded organelle;extracellular organelle;extracellular region part;extracellular vesicular exosome;intracellular organelle part;intracellular part;membrane-bounded organelle;membrane-bounded vesicle;nuclear part;nucleoplasm;organelle;organelle part;vesicle		SH3BGR	AACWWCAANK_UNKNOWN;ACCAAAG,MIR-9;ACEVEDO_LIVER_CANCER_DN;ACEVEDO_NORMAL_TISSUE_ADJACENT_TO_LIVER_TUMOR_DN;ACTAYRNNNCCCR_UNKNOWN;ACTGTGA,MIR-27A,MIR-27B;AKT_UP.V1_UP;AKT_UP_MTOR_DN.V1_UP;AUNG_GASTRIC_CANCER;BERNARD_PPAPDC1B_TARGETS_DN;BOYLAN_MULTIPLE_MYELOMA_D_CLUSTER_UP;BOYLAN_MULTIPLE_MYELOMA_D_UP;CACTGTG,MIR-128A,MIR-128B;CAGGTG_V$E12_Q6;chr6q13;CHYLA_CBFA2T3_TARGETS_UP;COLDREN_GEFITINIB_RESIST…	Completeproteome;Directproteinsequencing;Nucleus;Referenceproteome;SH3-binding								+			13	13	13	86	86	86	1.08831	0	79656000000	551	10.1231	7817300	41108000	81023000	139300000	68076000	18576000	31341000	121230000	89807000	45568000	11684000	34238000	148000000	100700000
Q9CRT8	Q9CRT8	Exportin-T	Xpot	green	grey	nuclear export	not shown	establishment of localization;establishment of localization in cell;establishment of protein localization;establishment of RNA localization;intracellular protein transport;intracellular transport;nuclear export;nuclear transport;nucleic acid transport;nucleobase-containing compound transport;nucleocytoplasmic transport;protein transport;RNA export from nucleus;RNA transport;transport;tRNA export …	binding;nucleic acid binding;RNA binding;tRNA binding	cell part;cytoplasm;intracellular organelle part;intracellular part;macromolecular complex;membrane part;nuclear part;nuclear pore;nucleoplasm;organelle part;pore complex;protein complex		IBN_N;Xpo1	ABRAMSON_INTERACT_WITH_AIRE;ACEVEDO_LIVER_CANCER_UP;ACEVEDO_LIVER_TUMOR_VS_NORMAL_ADJACENT_TISSUE_UP;AGUIRRE_PANCREATIC_CANCER_COPY_NUMBER_DN;BASSO_B_LYMPHOCYTE_NETWORK;BLUM_RESPONSE_TO_SALIRASIB_UP;BORCZUK_MALIGNANT_MESOTHELIOMA_UP;BROWN_MYELOID_CELL_DEVELOPMENT_DN;BRUINS_UVC_RESPONSE_VIA_TP53_GROUP_A;BYSTRYKH_HEMATOPOIESIS_STEM_CELL_AND_BRAIN_QTL_TRANS;CHEMNITZ_RESPONSE_TO_PROSTAGLANDIN_E2_UP;C…	Acetylation;Completeproteome;Cytoplasm;Nucleus;Referenceproteome;RNA-binding;Transport;tRNA-binding								+			34	34	34	38.1	38.1	38.1	2.04033	0	82792000000	1050	9.27453	1461700	2300700	1592900	2200600	3234500	1117600	2093000	684890	2470200	637130	1373600	1688800	3087100	2161900
Q8VCY6	Q8VCY6	U3 small nucleolar RNA-associated protein 6 homolog	Utp6	green	grey	processing of ribosomal RNA	not shown	cellular macromolecule metabolic process;cellular metabolic process;cellular nitrogen compound metabolic process;cellular process;macromolecule metabolic process;maturation of SSU-rRNA;maturation of SSU-rRNA from tricistronic rRNA transcript (SSU-rRNA, 5.8S rRNA, LSU-rRNA);metabolic process;ncRNA metabolic process;ncRNA processing;nitrogen compound metabolic process;nucleic acid metabolic process…	binding;nucleic acid binding;RNA binding;snoRNA binding	cell part;intracellular non-membrane-bounded organelle;intracellular organelle;intracellular organelle part;intracellular part;macromolecular complex;non-membrane-bounded organelle;nuclear part;nucleolar part;nucleolus;organelle;organelle part;preribosome;protein complex;Pwp2p-containing subcomplex of 90S preribosome;ribonucleoprotein complex;small-subunit processome	Ribosome biogenesis in eukaryotes	U3_assoc_6	BAKKER_FOXO3_TARGETS_DN;BILANGES_SERUM_SENSITIVE_VIA_TSC1;CAIRO_HEPATOBLASTOMA_CLASSES_UP;chr17q11;DODD_NASOPHARYNGEAL_CARCINOMA_DN;GAZDA_DIAMOND_BLACKFAN_ANEMIA_ERYTHROID_UP;GSE12366_GC_BCELL_VS_PLASMA_CELL_UP;GSE12366_PLASMA_CELL_VS_MEMORY_BCELL_DN;GSE12366_PLASMA_CELL_VS_NAIVE_BCELL_DN;GSE14308_TH17_VS_NATURAL_TREG_UP;GSE1432_1H_VS_24H_IFNG_MICROGLIA_DN;GSE1432_1H_VS_6H_IFNG_MICROGLIA_DN;GSE14…	Completeproteome;Nucleus;Referenceproteome;Repeat;rRNAprocessing										+	28	28	28	41.7	41.7	41.7	1.84775	0	19685000000	320	8.70307	255030	1413000	0	1253100	897750	618180	454180	3925700	0	1132700	1377800	2958000	4133900	6334300
Q9JK30-2;Q9JK30;A2AT40	Q9JK30-2;Q9JK30	Origin recognition complex subunit 3	Orc3	green	grey	replication	not shown	biosynthetic process;cell proliferation;cellular biosynthetic process;cellular macromolecule biosynthetic process;cellular macromolecule metabolic process;cellular metabolic process;cellular nitrogen compound metabolic process;cellular process;DNA metabolic process;DNA replication;macromolecule biosynthetic process;macromolecule metabolic process;metabolic process;neural precursor cell proliferat…	binding;DNA binding;nucleic acid binding	cell part;chromosomal part;intracellular organelle part;intracellular part;macromolecular complex;nuclear chromosome part;nuclear origin of replication recognition complex;nuclear part;nucleoplasm;organelle part;origin recognition complex;protein complex	Cell cycle;Cell cycle - yeast;Meiosis - yeast	ORC3_N	ACEVEDO_LIVER_CANCER_UP;BECKER_TAMOXIFEN_RESISTANCE_DN;BENPORATH_CYCLING_GENES;BIOCARTA_MCM_PATHWAY;BIOPOLYMER_METABOLIC_PROCESS;BLALOCK_ALZHEIMERS_DISEASE_DN;chr6q;CONCANNON_APOPTOSIS_BY_EPOXOMICIN_UP;DNA_BINDING;DNA_METABOLIC_PROCESS;DNA_REPLICATION;DODD_NASOPHARYNGEAL_CARCINOMA_DN;GRAESSMANN_APOPTOSIS_BY_DOXORUBICIN_DN;GRAESSMANN_RESPONSE_TO_MC_AND_DOXORUBICIN_DN;GSE12845_NAIVE_VS_DARKZONE_GC_…	Alternativesplicing;Completeproteome;DNA-binding;DNAreplication;Nucleus;Phosphoprotein;Proteomicsidentification;Referenceproteome	ORC complex (origin recognition complex)							+			13	13	13	22.8	22.8	22.8	1.91524	0	6418600000	144	8.21638	2171900	1389200	0	0	0	413430	154850	1160000	0	73867	0	1373800	981540	2392000
P42337;D3YY41	P42337;D3YY41	Phosphatidylinositol 4,5-bisphosphate 3-kinase catalytic subunit alpha isoform	Pik3ca	green	grey	signal transduction	not shown	adaptive immune response;adipose tissue development;alcohol metabolic process;anatomical structure development;anatomical structure formation involved in morphogenesis;angiogenesis;biological regulation;carbohydrate homeostasis;carbohydrate metabolic process;cell activation;cell chemotaxis;cell migration;cell motility;cellular carbohydrate metabolic process;cellular chemical homeostasis;cellular …	1-phosphatidylinositol-3-kinase activity;adenyl nucleotide binding;adenyl ribonucleotide binding;ATP binding;binding;catalytic activity;enzyme activator activity;enzyme regulator activity;inositol or phosphatidylinositol kinase activity;insulin receptor substrate binding;kinase activator activity;kinase activity;kinase regulator activity;lipid kinase activity;nucleotide binding;phosphatidylinosit…	1-phosphatidylinositol-4-phosphate 3-kinase, class IA complex;cell part;cell projection;cytoplasm;cytoplasmic part;cytosolic part;intracellular part;lamellipodium;macromolecular complex;membrane;phosphatidylinositol 3-kinase complex;plasma membrane;protein complex	Acute myeloid leukemia;Aldosterone-regulated sodium reabsorption;Amoebiasis;Apoptosis;B cell receptor signaling pathway;Bacterial invasion of epithelial cells;Carbohydrate digestion and absorption;Chagas disease (American trypanosomiasis);Chemokine signaling pathway;Chronic myeloid leukemia;Colorectal cancer;Endometrial cancer;ErbB signaling pathway;Fc epsilon RI signaling pathway;Fc gamma R-medi…	PI3_PI4_kinase;PI3K_C2;PI3K_p85B;PI3K_rbd;PI3Ka	AAGTCCA,MIR-422B,MIR-422A;BIOCARTA_ACH_PATHWAY;BIOCARTA_AKT_PATHWAY;BIOCARTA_ARF_PATHWAY;BIOCARTA_BAD_PATHWAY;BIOCARTA_BCELLSURVIVAL_PATHWAY;BIOCARTA_CDC42RAC_PATHWAY;BIOCARTA_CREB_PATHWAY;BIOCARTA_CTCF_PATHWAY;BIOCARTA_CTLA4_PATHWAY;BIOCARTA_CXCR4_PATHWAY;BIOCARTA_ECM_PATHWAY;BIOCARTA_EDG1_PATHWAY;BIOCARTA_EGF_PATHWAY;BIOCARTA_EIF4_PATHWAY;BIOCARTA_ERK5_PATHWAY;BIOCARTA_FCER1_PATHWAY;BIOCARTA_GC…	3D-structure;Angiogenesis;ATP-binding;Completeproteome;Kinase;Nucleotide-binding;Proteomicsidentification;Proto-oncogene;Referenceproteome;Serine/threonine-proteinkinase;Transferase							+	+			43	43	43	45.5	45.5	45.5	2.09486	0	45147000000	634	8.85529	1108500	2468200	1448700	1619800	1178500	44276	982350	1231500	2361700	371740	1267200	937240	1444700	1158100
Q922L6;Q3TW27	Q922L6;Q3TW27	Negative elongation factor D	Nelfcd	green	grey	transcription	not shown	biological regulation;biosynthetic process;cellular biosynthetic process;cellular macromolecule biosynthetic process;cellular macromolecule metabolic process;cellular metabolic process;cellular nitrogen compound metabolic process;cellular process;macromolecule biosynthetic process;macromolecule metabolic process;metabolic process;negative regulation of biological process;negative regulation of bi…		cell part;intracellular organelle part;intracellular part;macromolecular complex;membrane;NELF complex;nuclear part;nucleoplasm part;organelle part;protein complex;transcription elongation factor complex		TH1		Completeproteome;Nucleus;Proteomicsidentification;Referenceproteome;Repressor;Transcription;Transcriptionregulation								+			18	18	18	38.7	38.7	38.7	1.82135	0	25536000000	336	9.02694	2051400	633630	1185400	5137300	1786900	603280	1355600	1861200	4918500	2000900	890660	2759100	3304700	3157400
Q8C3P7;Q8C3P7-2;G5E922;G3UZP2;G3UXX7;G3UYB5;G3UZP3;G3UY98;G3UX68;D6RHT1;G3UXN3	Q8C3P7;Q8C3P7-2;G5E922;G3UZP2	N6-adenosine-methyltransferase 70 kDa subunit	Mettl3	green	grey	transcription	not shown	adenosine to inosine editing;base conversion or substitution editing;biological regulation;cellular macromolecule metabolic process;cellular metabolic process;cellular nitrogen compound metabolic process;cellular process;circadian rhythm;developmental process;macromolecule metabolic process;macromolecule methylation;macromolecule modification;metabolic process;methylation;mRNA destabilization;mRN…	binding;catalytic activity;methyltransferase activity;mRNA (2'-O-methyladenosine-N6-)-methyltransferase activity;mRNA (N6-adenosine)-methyltransferase activity;mRNA methyltransferase activity;nucleic acid binding;RNA binding;RNA methyltransferase activity;S-adenosylmethionine-dependent methyltransferase activity;transferase activity;transferase activity, transferring one-carbon groups	cell part;intracellular membrane-bounded organelle;intracellular organelle;intracellular organelle part;intracellular part;membrane-bounded organelle;nuclear body;nuclear part;nuclear speck;nucleoplasm part;nucleus;organelle;organelle part		MT-A70	ACEVEDO_LIVER_CANCER_UP;ACEVEDO_LIVER_TUMOR_VS_NORMAL_ADJACENT_TISSUE_UP;BONOME_OVARIAN_CANCER_SURVIVAL_SUBOPTIMAL_DEBULKING;BROWNE_HCMV_INFECTION_24HR_UP;BROWNE_HCMV_INFECTION_4HR_DN;CHENG_IMPRINTED_BY_ESTRADIOL;chr14q11;CREIGHTON_ENDOCRINE_THERAPY_RESISTANCE_1;EGFR_UP.V1_DN;ENK_UV_RESPONSE_EPIDERMIS_UP;FOURNIER_ACINAR_DEVELOPMENT_LATE_2;FUJII_YBX1_TARGETS_DN;GCCATNTTG_V$YY1_Q6;GOLDRATH_EFF_VS_M…	Acetylation;Alternativesplicing;Biologicalrhythms;Completeproteome;Methyltransferase;Nucleus;Phosphoprotein;Proteomicsidentification;Referenceproteome;RNA-binding;S-adenosyl-L-methionine;Transferase								+			24	24	24	55.3	55.3	55.3	1.81033	0	16707000000	308	8.73154	2510800	262250	812450	746760	3811300	1877800	2801100	1691700	84330	0	0	4479200	1061300	1297200
Q91X84;Q91X84-2;F6Y626	Q91X84	CREB-regulated transcription coactivator 3	Crtc3	green	grey	transcription	not shown	biological regulation;biosynthetic process;cell activation;cellular biosynthetic process;cellular component assembly;cellular component organization;cellular component organization or biogenesis;cellular macromolecule biosynthetic process;cellular macromolecule metabolic process;cellular metabolic process;cellular nitrogen compound metabolic process;cellular process;energy homeostasis;homeostatic…	cAMP response element binding protein binding;protein binding transcription factor activity;transcription coactivator activity;transcription cofactor activity;transcription factor binding transcription factor activity	cell part;cytoplasm;intracellular membrane-bounded organelle;intracellular organelle;intracellular organelle part;intracellular part;membrane-bounded organelle;nuclear part;nucleoplasm;nucleus;organelle;organelle part		TORC_C;TORC_M;TORC_N	BONOME_OVARIAN_CANCER_SURVIVAL_SUBOPTIMAL_DEBULKING;BRUINS_UVC_RESPONSE_EARLY_LATE;chr15q26;FIGUEROA_AML_METHYLATION_CLUSTER_3_DN;GROSS_HYPOXIA_VIA_ELK3_AND_HIF1A_UP;GSE10239_MEMORY_VS_DAY4.5_EFF_CD8_TCELL_UP;GSE10239_NAIVE_VS_DAY4.5_EFF_CD8_TCELL_UP;GSE11057_EFF_MEM_VS_CENT_MEM_CD4_TCELL_DN;GSE11057_NAIVE_VS_EFF_MEMORY_CD4_TCELL_UP;GSE12366_GC_VS_MEMORY_BCELL_DN;GSE12845_IGD_NEG_BLOOD_VS_NAIVE_T…	Activator;Alternativesplicing;Completeproteome;Cytoplasm;Nucleus;Phosphoprotein;Referenceproteome;Transcription;Transcriptionregulation								+			15	15	14	27.8	27.8	25.7	1.82624	0	10713000000	91	8.70771	0	0	1552900	0	112400	2173100	159600	566860	0	0	0	9115400	757330	219730
H9KUX8;O88738;S4R1L5;O88738-3;S4R2P8;O88738-2;S4R268;J3QP64;S4R2N7;S4R1R8;S4R1S3;S4R2J7;REV__Q5NCS9	H9KUX8;O88738;S4R1L5;O88738-3;S4R2P8;O88738-2	Baculoviral IAP repeat-containing protein 6	Birc6	green	grey	ubiquitin-proteasome-system	not shown	anatomical structure development;apoptosis;biological regulation;cell cycle phase;cell cycle process;cell death;cell division;cellular component organization;cellular component organization at cellular level;cellular component organization or biogenesis;cellular component organization or biogenesis at cellular level;cellular macromolecule metabolic process;cellular metabolic process;cellular proc…	acid-amino acid ligase activity;caspase inhibitor activity;caspase regulator activity;catalytic activity;cysteine-type endopeptidase inhibitor activity;endopeptidase inhibitor activity;endopeptidase regulator activity;enzyme inhibitor activity;enzyme regulator activity;ligase activity;ligase activity, forming carbon-nitrogen bonds;peptidase inhibitor activity;peptidase regulator activity;small co…	cell part;cytoplasm;cytoplasmic part;cytoskeletal part;endosome;Golgi apparatus part;intracellular membrane-bounded organelle;intracellular organelle;intracellular organelle part;intracellular part;membrane;membrane-bounded organelle;microtubule organizing center;midbody;organelle;organelle part;spindle pole;trans-Golgi network	Ubiquitin mediated proteolysis	BIR;DUF3643;UQ_con	AACTTT_UNKNOWN;AAGCACA,MIR-218;ACTACCT,MIR-196A,MIR-196B;ACTGAAA,MIR-30A-3P,MIR-30E-3P;AGTCAGC,MIR-345;ANTI_APOPTOSIS;APOPTOSIS_GO;ATTACAT,MIR-380-3P;BENPORATH_MYC_MAX_TARGETS;CELL_DEVELOPMENT;CHANDRAN_METASTASIS_TOP50_UP;CHANDRAN_METASTASIS_UP;chr2p22;CTTGTAT,MIR-381;DANG_BOUND_BY_MYC;ESC_V6.5_UP_LATE.V1_DN;GRAESSMANN_APOPTOSIS_BY_DOXORUBICIN_DN;GSE17721_4_VS_24H_GARDIQUIMOD_BMDM_DN;GSE17721_PAM…	Alternativesplicing;Apoptosis;Cellcycle;Celldivision;Completeproteome;Cytoplasm;Cytoskeleton;Endosome;Golgiapparatus;Ligase;Membrane;Mitosis;Phosphoprotein;Proteaseinhibitor;Proteomicsidentification;Referenceproteome;Thiolproteaseinhibitor;Ublconjugation;Ublconjugationpathway	Birc6 homodimer complex							+			158	158	157	45.6	45.6	45.4	2.72379	0	272000000000	3476	9.15506	2638600	5923700	3184400	2007000	1360500	611760	2642100	1500000	2270000	2329100	1426900	1306300	1558500	808600
Q60838	Q60838	Segment polarity protein dishevelled homolog DVL-2	Dvl2	green	grey	Wnt signaling	not shown	anatomical structure development;anatomical structure formation involved in morphogenesis;anatomical structure morphogenesis;biological regulation;biosynthetic process;canonical Wnt receptor signaling pathway;canonical Wnt receptor signaling pathway involved in regulation of cell proliferation;cell surface receptor linked signaling pathway;cellular biosynthetic process;cellular localization;cellu…	binding;frizzled binding;G-protein-coupled receptor binding;identical protein binding;protein binding;protein domain specific binding;protein self-association;receptor binding	apical part of cell;cell cortex;cell part;clathrin-coated vesicle;coated vesicle;cytoplasm;cytoplasmic membrane-bounded vesicle;cytoplasmic part;cytoplasmic vesicle;cytoskeleton;cytosol;intracellular membrane-bounded organelle;intracellular non-membrane-bounded organelle;intracellular organelle;intracellular part;membrane;membrane-bounded organelle;membrane-bounded vesicle;non-membrane-bounded or…	Basal cell carcinoma;Melanogenesis;Notch signaling pathway;Pathways in cancer;Wnt signaling pathway	DEP;Dishevelled;DIX;Dsh_C;PDZ	ACTGTGA,MIR-27A,MIR-27B;ANATOMICAL_STRUCTURE_DEVELOPMENT;BENPORATH_NANOG_TARGETS;BENPORATH_SOX2_TARGETS;BYSTRYKH_HEMATOPOIESIS_STEM_CELL_QTL_TRANS;CACCAGC,MIR-138;CACGTG_V$MYC_Q2;CACTGTG,MIR-128A,MIR-128B;CASORELLI_ACUTE_PROMYELOCYTIC_LEUKEMIA_DN;chr17p13;CREIGHTON_ENDOCRINE_THERAPY_RESISTANCE_4;CYTOPLASM;GGGCGGR_V$SP1_Q6;GSE14000_4H_VS_16H_LPS_DC_TRANSLATED_RNA_DN;GSE15930_STIM_VS_STIM_AND_IFNAB…	3D-structure;Cellmembrane;Completeproteome;Cytoplasm;Cytoplasmicvesicle;Developmentalprotein;Membrane;Methylation;Phosphoprotein;Referenceproteome;Wntsignalingpathway	Ccd1-Dvl2 complex;Ccd1-Dvl2-Rac complex;Dvl2-Rac complex							+			15	10	10	28.3	22	22	1.89686	0	8627100000	158	8.45874	277930	0	0	0	108980	0	0	330650	0	0	172530	971210	185290	134230
A3KMP2;A3KMP2-2;D6RH59	A3KMP2;A3KMP2-2	Tetratricopeptide repeat protein 38	Ttc38	green	grey	NaN	unknown			extracellular membrane-bounded organelle;extracellular organelle;extracellular region part;extracellular vesicular exosome;membrane-bounded organelle;membrane-bounded vesicle;organelle;vesicle			AGGGCCA,MIR-328;ALK_DN.V1_DN;BENPORATH_CYCLING_GENES;BOYAULT_LIVER_CANCER_SUBCLASS_G3_DN;CHANG_IMMORTALIZED_BY_HPV31_UP;chr22q13;DODD_NASOPHARYNGEAL_CARCINOMA_UP;GNF2_IL2RB;GNF2_PTPN4;GSE10239_KLRG1INT_VS_KLRG1HIGH_EFF_CD8_TCELL_DN;GSE12845_IGD_POS_VS_NEG_BLOOD_BCELL_DN;GSE13229_IMM_VS_MATURE_NKCELL_DN;GSE1432_CTRL_VS_IFNG_1H_MICROGLIA_UP;GSE17974_IL4_AND_ANTI_IL12_VS_UNTREATED_48H_ACT_CD4_TCELL_…	Alternativesplicing;Completeproteome;Proteomicsidentification;Referenceproteome;Repeat;TPRrepeat								+			24	24	24	65.2	65.2	65.2	1.71786	0	16438000000	361	8.80087	3249800	1820600	3589800	3392600	2256600	234050	3319800	506020	6575100	398130	169210	2618200	1282100	1769100
[truncated: 12 more columns]
